# Supplementary material for: Synthesis of phenanthrylboroles and formal nitrene insertion to access azaborapyrenes
Source: Royal Society of Chemistry journal article supplement (doi:10.1039/d4cc02863e), 2024-01-01
Supplement: d4cc02863e1.pdf [file d4cc02863e1.pdf]

## Supporting Information for:

# Synthesis of Phenanthrylboroles and Formal Nitrene Insertion to Access Azaborapyrenes

*Harie Zacharias,<sup>a</sup> Ayesha Begum,<sup>a</sup> Jianhua Han,<sup>b</sup> Tyler A. Bartholome,<sup>a</sup> Todd B. Marder,<sup>b</sup> and  
Caleb D. Martin<sup>\*a</sup>*

<sup>a</sup> Baylor University, Department of Chemistry and Biochemistry, One Bear Place #97348, Waco,  
TX 76798.

<sup>b</sup> Institut für Anorganische Chemie and Institute for Sustainable Chemistry & Catalysis with Boron  
Julius-Maximilians-Universität Würzburg Am Hubland, 97074.

E-mail: [caleb\\_d\\_martin@baylor.edu](mailto:caleb_d_martin@baylor.edu)

## Table of Contents

|                                     |     |
|-------------------------------------|-----|
| Experimental details.....           | S3  |
| NMR spectra .....                   | S7  |
| Photophysical studies.....          | S29 |
| X-ray crystallographic details..... | S31 |
| References.....                     | S34 |

## Experimental details

**General Considerations:** All manipulations were performed under an inert atmosphere in a nitrogen filled MBraun Unilab glove box or using standard Schlenk techniques. Solvents were purchased from commercial sources as anhydrous grade, dried further using a JC Meyer Solvent System with dual columns packed with solvent-appropriate drying agents, and stored over 4 Å molecular sieves. Deuterated solvents for NMR spectroscopy were purchased from Cambridge Isotope Laboratories and dried by stirring for 5 days over CaH<sub>2</sub>, distilled, and stored over 4 Å molecular sieves. Solutions of *n*BuLi in hexanes were purchased from Acros Organics and titrated to determine the precise molarity before use. Boron trichloride solution (1 M in methylene chloride) and PhBCl<sub>2</sub> were purchased from Acros Organics and used as received. Multinuclear NMR spectra (<sup>1</sup>H, <sup>13</sup>C{<sup>1</sup>H}, <sup>31</sup>P{<sup>1</sup>H}, <sup>11</sup>B) were recorded on a Bruker Ascend 400 MHz instrument. High Resolution mass spectra (HRMS) were obtained at the Baylor University Mass Spectrometry Center on a Thermo Scientific LTQ Orbitrap Discovery spectrometer using +ESI. Melting points were measured with a Thomas Hoover Uni-melt capillary melting point apparatus and are uncorrected. The photophysical experiments were conducted utilizing standard quartz cuvettes with dimensions of 1 cm × 1 cm. UV-visible absorption spectra were acquired employing an Agilent 8453 diode array UV-visible spectrophotometer. Extinction coefficients were derived from five independently prepared samples dissolved in dichloromethane (DCM). Fluorescence quantum yields were determined employing a calibrated integrating sphere with an inner diameter of 150 mm, in conjunction with the FLSP920 spectrometer. Fluorescence lifetimes were recorded using the time-correlated single-photon counting (TCSPC) method employing the FLSP920 spectrometer. Samples were excited using a picosecond pulsed diode laser emitting at a wavelength of 273.8 nm. Single crystal X-ray diffraction data were collected on a Bruker Apex III-CCD detector using Mo-Kα radiation ( $\lambda = 0.71073 \text{ \AA}$ ). Crystals were selected under paratone oil, mounted on MiTeGen micromounts, and immediately placed in a cold stream of N<sub>2</sub>. Structures were solved and refined using SHELXTL and figures produced using OLEX2.<sup>1,2</sup>

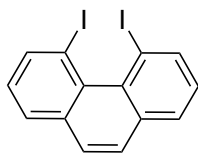

**4,5-Diiodophenanthrene:** 4,5-Diiodophenanthrene was prepared by the procedure reported by Bock and Havlas with modifications to the work up detailed below.<sup>3</sup> A solution of *n*BuLi in hexane (2.5 M, 7.12 mL, 17.8 mmol)

was added to a suspension of phenanthrene (1.51 g, 8.45 mmol) in tetramethylethylenediamine (3.00 mL, 18.9 mmol) at 0 °C. The resulting mixture was stirred at 23 °C for 30 min, then was refluxed at 70 °C for 2 h. After the reaction cooled to 23 °C, the volatiles were removed under vacuum. The residue was dissolved in tetrahydrofuran (10 mL) and cooled to -78 °C. A solution of iodine in tetrahydrofuran (4.73 g, 18.6 mmol, 20 mL) was slowly added over a 15 min period. The resulting dark purple solution was stirred for 1 h at -78 °C, then the bath was removed to allow the solution to warm to 23 °C and stirring was continued for 17 h. The reaction mixture was quenched with 10 % aqueous NaHSO<sub>3</sub> (50 mL) and extracted with diethyl ether (3 × 50 mL). The organic phase was washed twice with brine, dried over MgSO<sub>4</sub>, filtered, and the volatiles removed under reduced pressure. Acetone (5 mL) was added to the residue to generate a solid. The solid was recrystallized by dissolving in warm chloroform and storing at -78 °C to afford pale-yellow crystals (0.763 g, 21% yield). The multinuclear NMR spectra match the literature data.

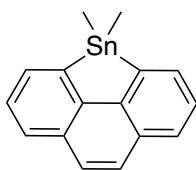

**1:** A hexanes solution of *n*BuLi (2.37 M in hexanes, 1.30 mL, 2.93 mmol) was added dropwise to a diethyl ether solution of 4,5-diiodophenanthrene (0.600 g, 1.40 mmol, 5.0 mL) at -78 °C. The reaction was stirred for 2 h at 23 °C and a

diethyl ether solution of SnCl<sub>2</sub>(CH<sub>3</sub>)<sub>2</sub> (0.43 g, 2.0 mmol, 5 mL) was added dropwise over a 10 min period to the reaction mixture which was then stirred for 17 h. The reaction mixture was filtered to obtain a yellow solution. The volatiles were removed from the supernatant under reduced pressure and the product extracted with 3 mL *n*-pentane at -78 °C. The solvent was removed under reduced pressure to obtain the product as a pale-yellow oil (0.380 g, 84% yield). <sup>1</sup>H NMR (400

MHz, CDCl<sub>3</sub>):  $\delta$  7.91 (dd,  $J = 7$ , 1 Hz, 2H), 7.87 (dd,  $J = 8$ , 1 Hz, 2H), 7.74 – 7.71 (m, 2H), 7.62 (dd,  $J = 8$ , 7 Hz, 2H), 0.64 (s,  $^2J_{\text{H-Sn}} = 32$  Hz, 6H).  $^{13}\text{C}\{^1\text{H}\}$  NMR (75 MHz, CDCl<sub>3</sub>):  $\delta$  142.51, 140.60, 134.08, 131.27, 127.99, 126.94, 126.85, –8.07. High-resolution mass spectrometry (HRMS) electrospray ionization: +ESI-HRMS for [C<sub>16</sub>H<sub>15</sub>Sn<sub>1</sub>]<sup>+</sup> calcd.  $m/z$  327.0196, found: 327.0189.

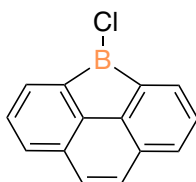

**2Cl:** A hexanes solution of **1** (0.0925 g, 0.285 mmol, 5.0 mL) was prepared in a pressure tube charged with a magnetic stir bar. A solution of 1 M boron trichloride in CH<sub>2</sub>Cl<sub>2</sub> (315  $\mu\text{L}$ , 0.315 mmol) was added dropwise and the pressure tube was closed and heated at 70 °C for 48 h while stirring. The reaction mixture was filtered and the supernatant stripped of volatiles under vacuum. The product was extracted in *n*-pentane (5 mL) at –78 °C. Removing the *n*-pentane at reduced pressure afforded the product as pale-yellow crystals (0.027 g, 43% yield). Crystals for X-ray crystallography were obtained at 23 °C by dissolving the product in a 1:1 mixture of benzene and hexanes.  $^1\text{H}$  NMR (400 MHz, CDCl<sub>3</sub>):  $\delta$  7.78 – 7.73 (m, 4H), 7.62 (s, 2H), 7.44 (t,  $J = 8$  Hz, 2H).  $^{13}\text{C}\{^1\text{H}\}$  NMR (101 MHz, CDCl<sub>3</sub>):  $\delta$  130.63, 130.56, 128.56, 128.26, 127.85, 125.19.  $^{11}\text{B}$  NMR (128 MHz, CDCl<sub>3</sub>):  $\delta$  63.3.

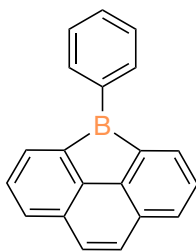

**2Ph:** A hexanes solution of **1** (0.296 g, 1.00 mmol, 10 mL) was prepared in a pressure tube charged with a magnetic stir bar. Dichlorophenylborane (0.159 g, 1.00 mmol) was added dropwise and the mixture was heated at 75 °C for 48 h while stirring. The reaction mixture was filtered, the volatiles were removed under vacuum from the supernatant, and the product was extracted with *n*-pentane at –78 °C. Removing the *n*-pentane at reduced pressure gave the product as a yellow oil (0.084 g, 32% yield).  $^1\text{H}$  NMR (400 MHz, CDCl<sub>3</sub>):  $\delta$  8.52 - 8.46 (m, 2H), 8.08 (dd,  $J = 7$ , 1 Hz, 2H), 7.77 (dd,  $J = 8$ , 0.5 Hz, 2H), 7.70 - 7.58 (m, 5H), 7.46 (dd,  $J = 8$ , 7 Hz, 2H).  $^{13}\text{C}\{^1\text{H}\}$  NMR (101 MHz, CDCl<sub>3</sub>):  $\delta$

147.99, 137.30, 137.23, 133.37, 133.18, 133.11, 130.99, 128.46, 128.19, 128.03, 125.18.  $^{11}\text{B}$  NMR (128 MHz,  $\text{CDCl}_3$ ):  $\delta$  63.1.

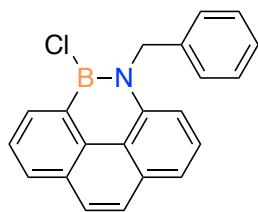

**3Cl:** To a hexanes solution of **2Cl** (0.019 g, 0.10 mmol, 5.0 mL), benzyl azide (10.7  $\mu\text{L}$ , 0.100 mmol) was added dropwise and the reaction was stirred for 15 min at 23  $^\circ\text{C}$ . The addition of *n*-pentane (5 mL) gave a white precipitate. Filtering and drying the precipitate at reduced pressure gave the product (0.025 g, 76% yield). Single crystals for X-ray diffraction were grown by vapor diffusion from a chloroform solution of **3Cl** into toluene.  $^1\text{H}$  NMR (400 MHz,  $\text{C}_6\text{D}_6$ ):  $\delta$  8.84 (d,  $J = 8$ , 1H), 7.98 (d,  $J = 8$  Hz, 1H), 7.72 - 7.66 (m, 3H), 7.54 (d,  $J = 8$  Hz, 1H), 7.41 - 7.31 (m, 2H), 7.06 - 6.95 (m, 5H), 5.43 (s, 2H).  $^{13}\text{C}\{^1\text{H}\}$  NMR (101 MHz,  $\text{C}_6\text{D}_6$ )  $\delta$  138.50, 136.75, 134.59, 132.70, 131.94, 131.18, 129.95, 129.67, 127.87, 127.68, 126.16, 126.04, 125.83, 125.04, 124.97, 120.87, 119.62, 112.99, 50.36.  $^{11}\text{B}$  NMR (128 MHz,  $\text{C}_6\text{D}_6$ ):  $\delta$  37.2.

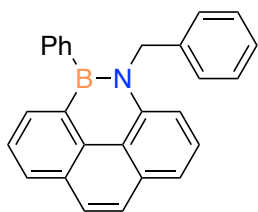

**3Ph:** To a hexanes solution of **2Ph** (0.237 g, 0.100 mmol, 5.0 mL), benzyl azide (10.7  $\mu\text{L}$ , 0.100 mmol) was added dropwise and the reaction was stirred for 15 min at 23  $^\circ\text{C}$ . The addition of *n*-pentane (5 mL) generated a precipitate, the supernatant was decanted, and drying the precipitate in vacuo gave a yellow residue. The residue was loaded onto a silica column and **3Ph** was isolated by chromatography using 9:1 hexanes/ $\text{CH}_2\text{Cl}_2$  as the eluent, giving **3Ph** as a pale-yellow oil (0.025 g, 67% yield).  $^1\text{H}$  NMR (400 MHz,  $\text{CDCl}_3$ )  $\delta$  8.27 (dd,  $J = 8$ , 1 Hz, 1H), 8.06 (dd,  $J = 7$ , 1 Hz, 1H), 8.04 - 7.96 (m, 2H), 7.86 - 7.77 (m, 2H), 7.70 (t,  $J = 8$  Hz, 1H), 7.64 - 7.51 (m, 3H), 7.47 - 7.35 (m, 3H), 7.26 - 7.10 (m, 5H), 5.52 (s, 2H).  $^{13}\text{C}\{^1\text{H}\}$  NMR (101 MHz,  $\text{C}_6\text{D}_6$ ):  $\delta$  139.74, 137.96, 137.54, 133.93, 133.46, 133.31, 133.16, 132.42, 131.18, 131.09, 130.90, 129.34, 129.08, 127.38, 127.25, 127.05, 126.27, 126.18, 125.33, 122.09, 120.86, 114.23  $^{11}\text{B}$  NMR (128 MHz,  $\text{CDCl}_3$ ):  $\delta$  29.6.

Figure S1:  $^1\text{H}$  NMR spectrum of **1** in  $\text{CDCl}_3$  (400 MHz)

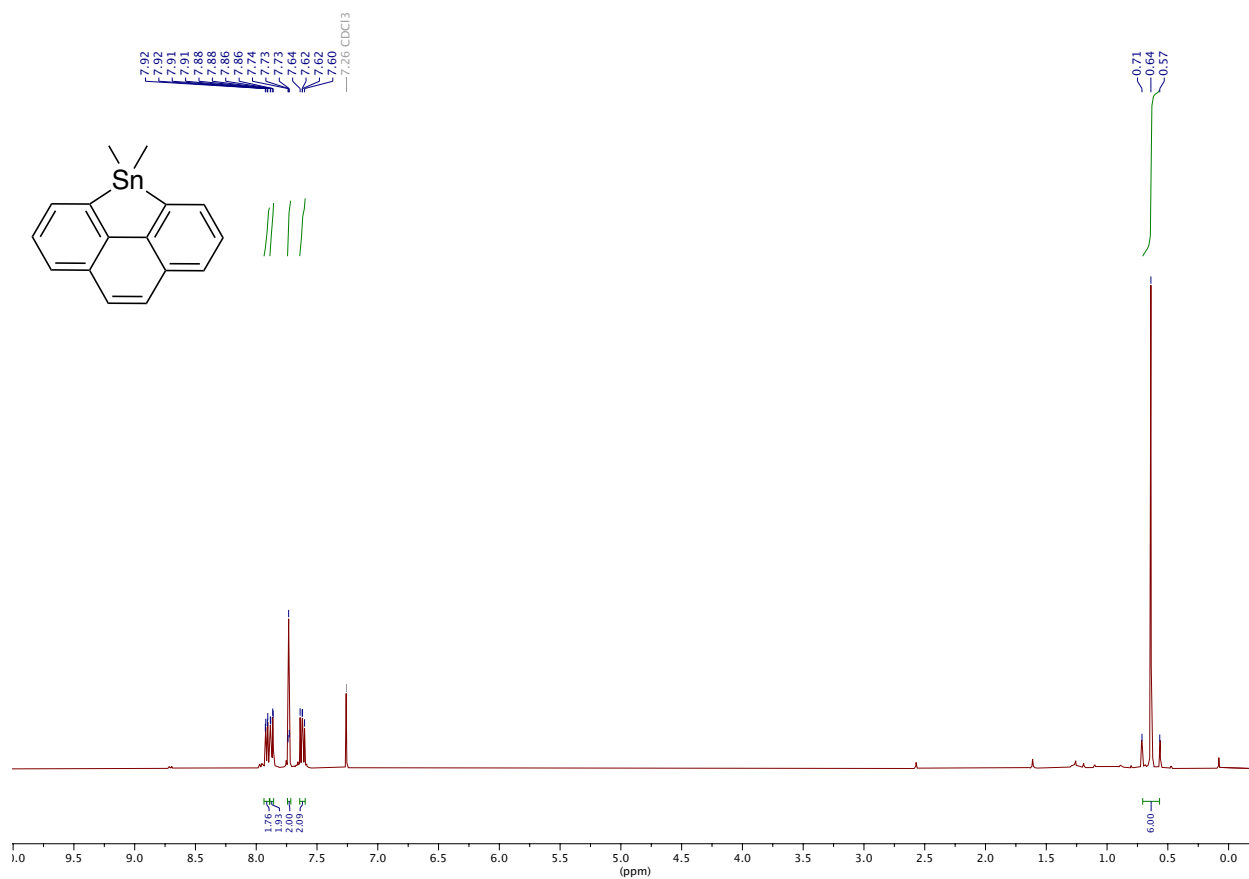

Figure S2:  $^1\text{H}$  NMR spectrum of **1** in  $\text{CDCl}_3$  (400 MHz, expanded view of the aryl region)

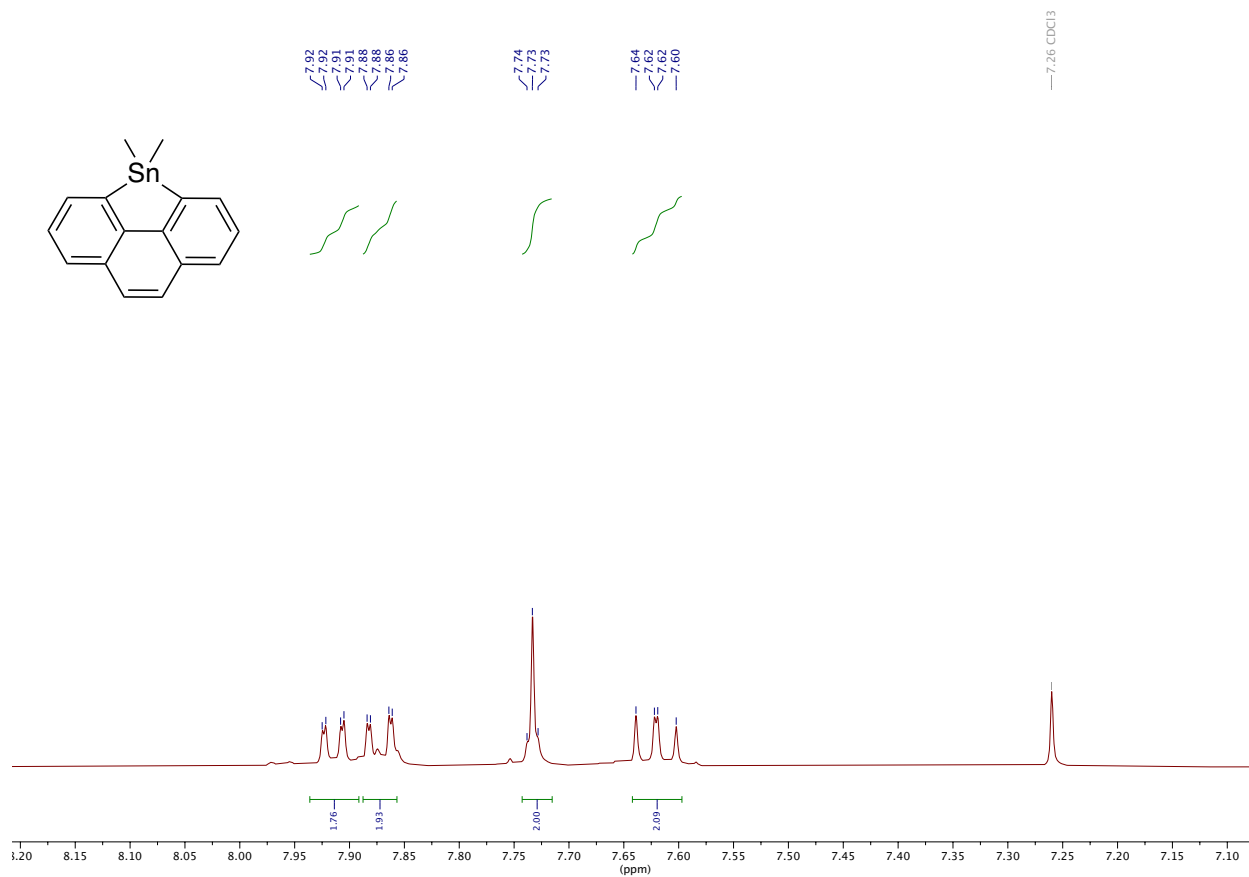



Figure S3:  $^{13}\text{C}\{^1\text{H}\}$  NMR spectrum of **1** in  $\text{CDCl}_3$  (101 MHz)

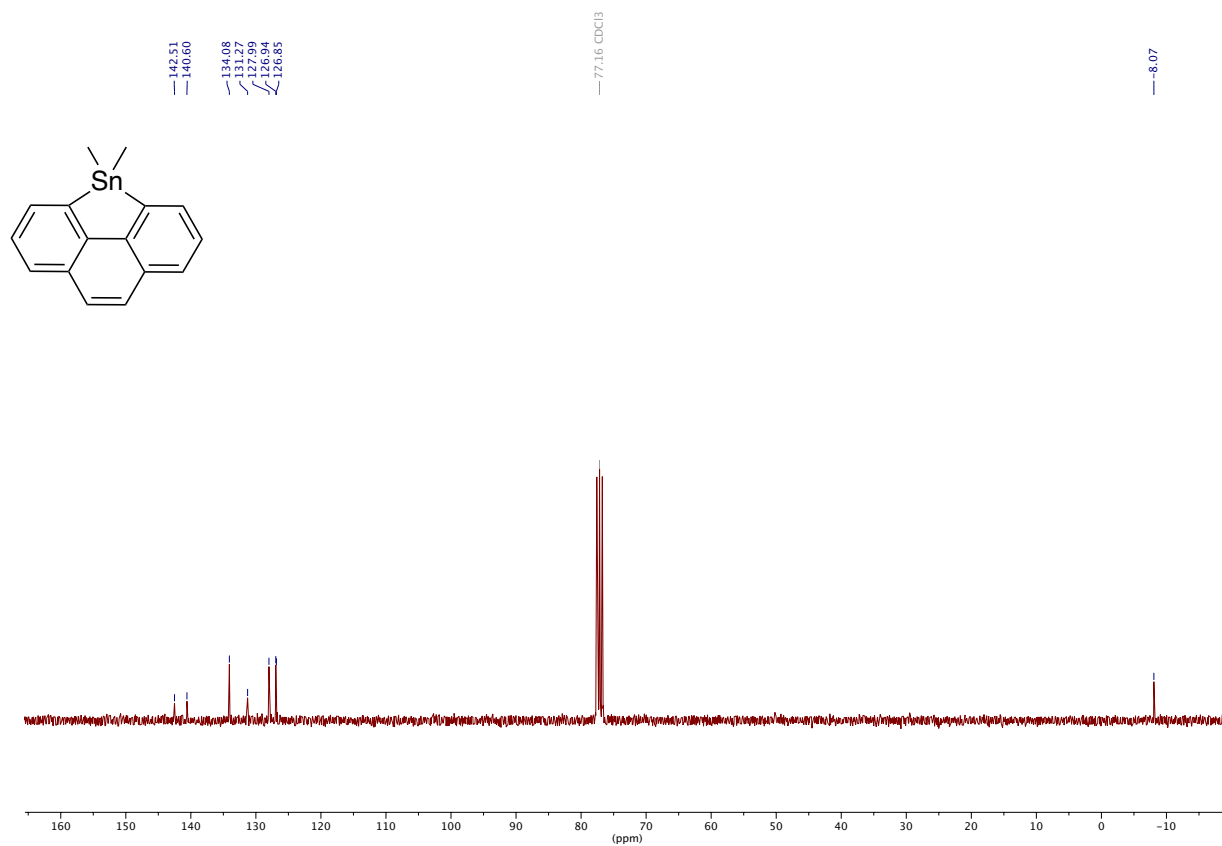

Figure S4:  $^1\text{H}$  NMR spectrum of **2Cl** in  $\text{CDCl}_3$  (400 MHz)

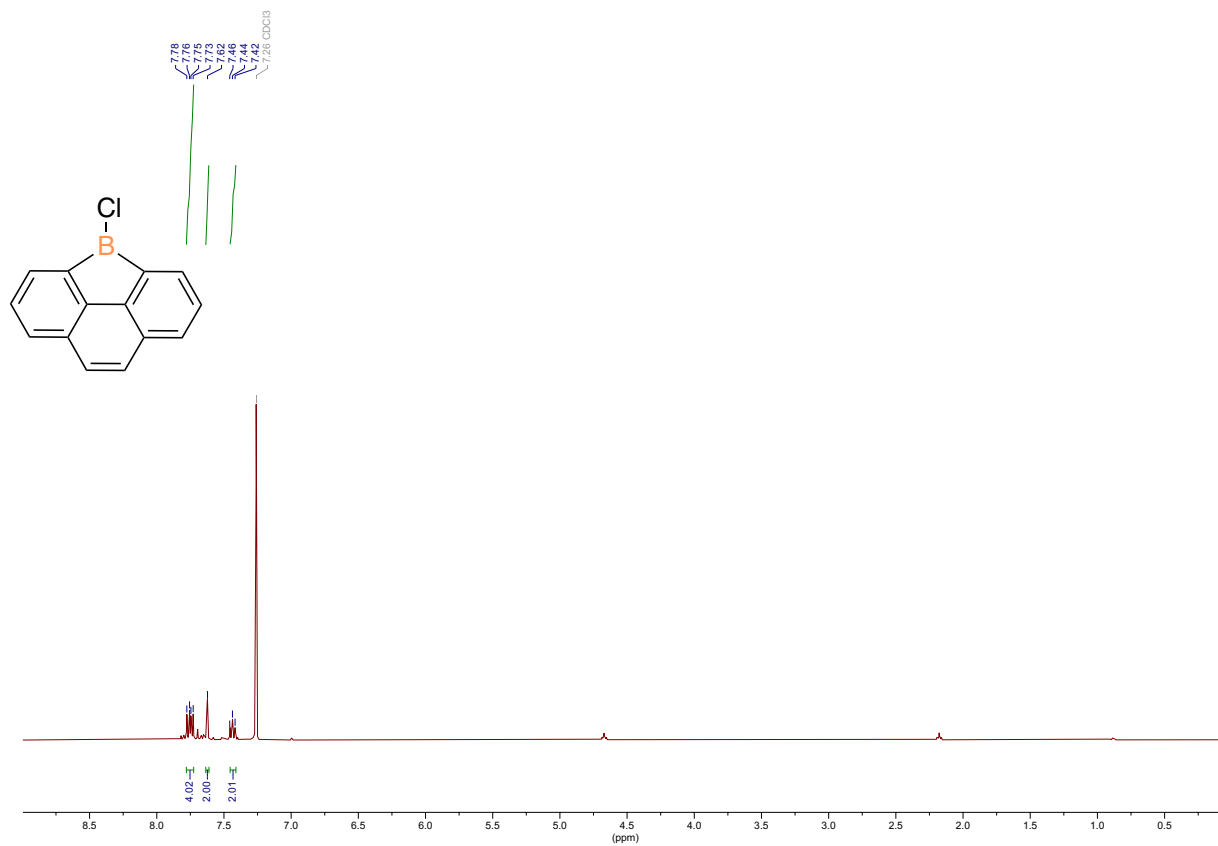

Figure S5:  $^1\text{H}$  NMR spectrum of **2Cl** in  $\text{CDCl}_3$  (400 MHz, expanded view of the aryl region)

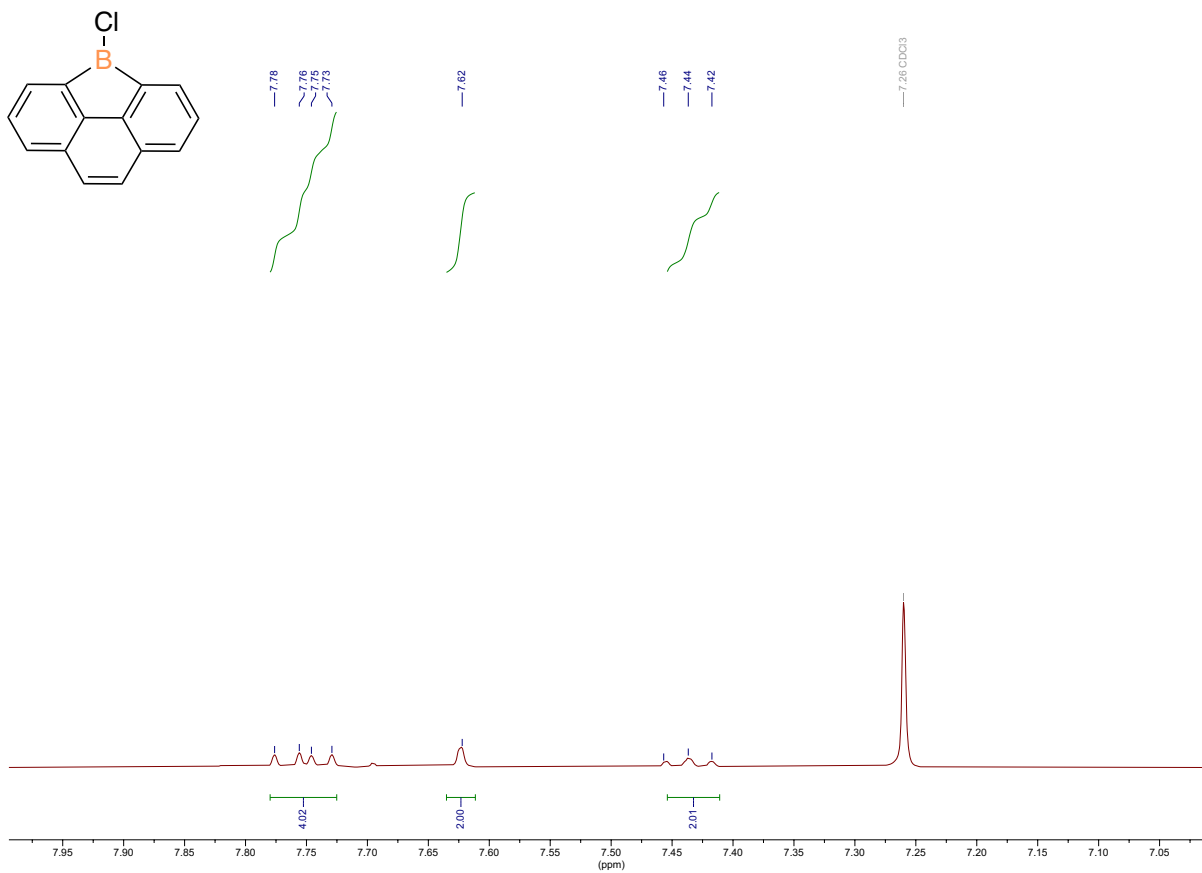

Figure S6:  $^{13}\text{C}\{^1\text{H}\}$  NMR spectrum of **2Cl** in  $\text{CDCl}_3$  (101 MHz)

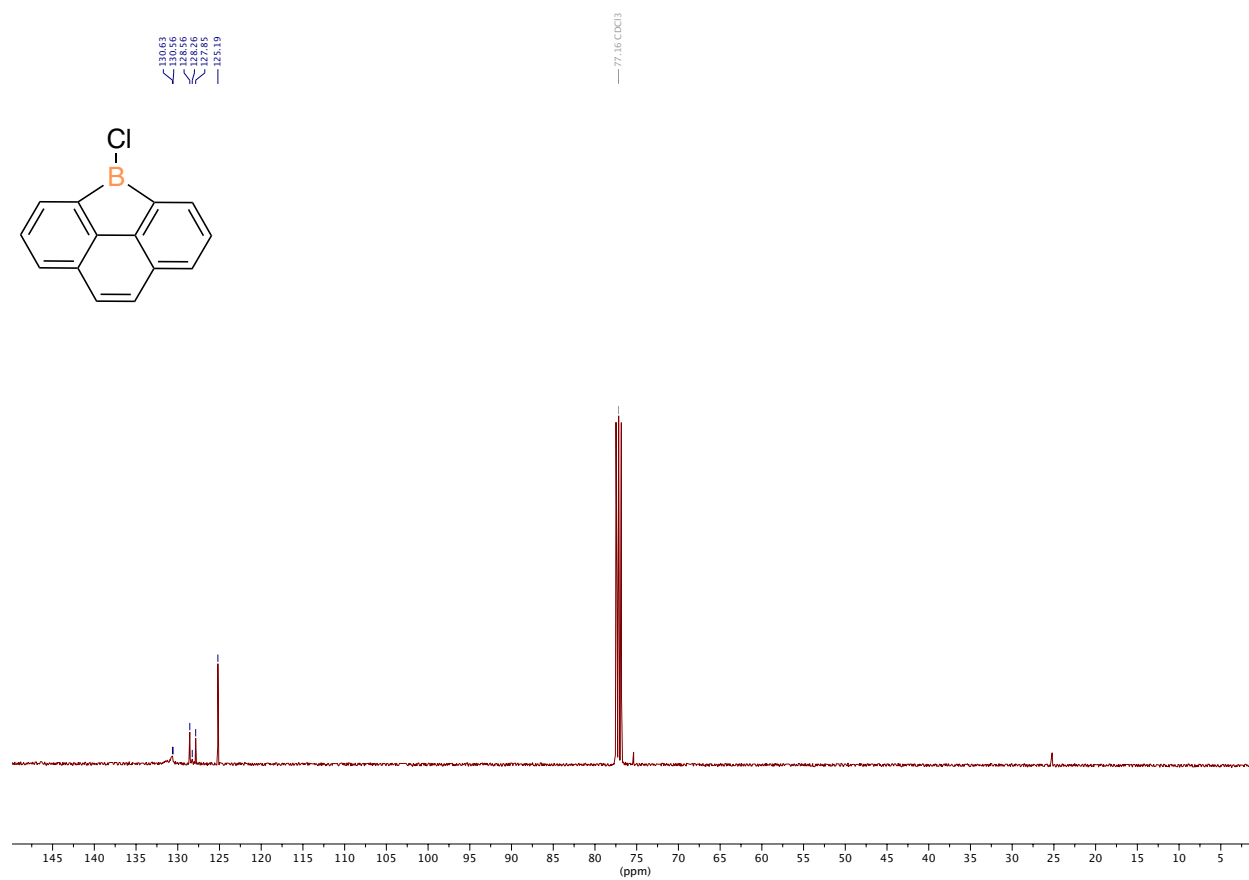

Figure S7:  $^{11}\text{B}$  NMR spectrum of **2Cl** in  $\text{CDCl}_3$  (128 MHz)

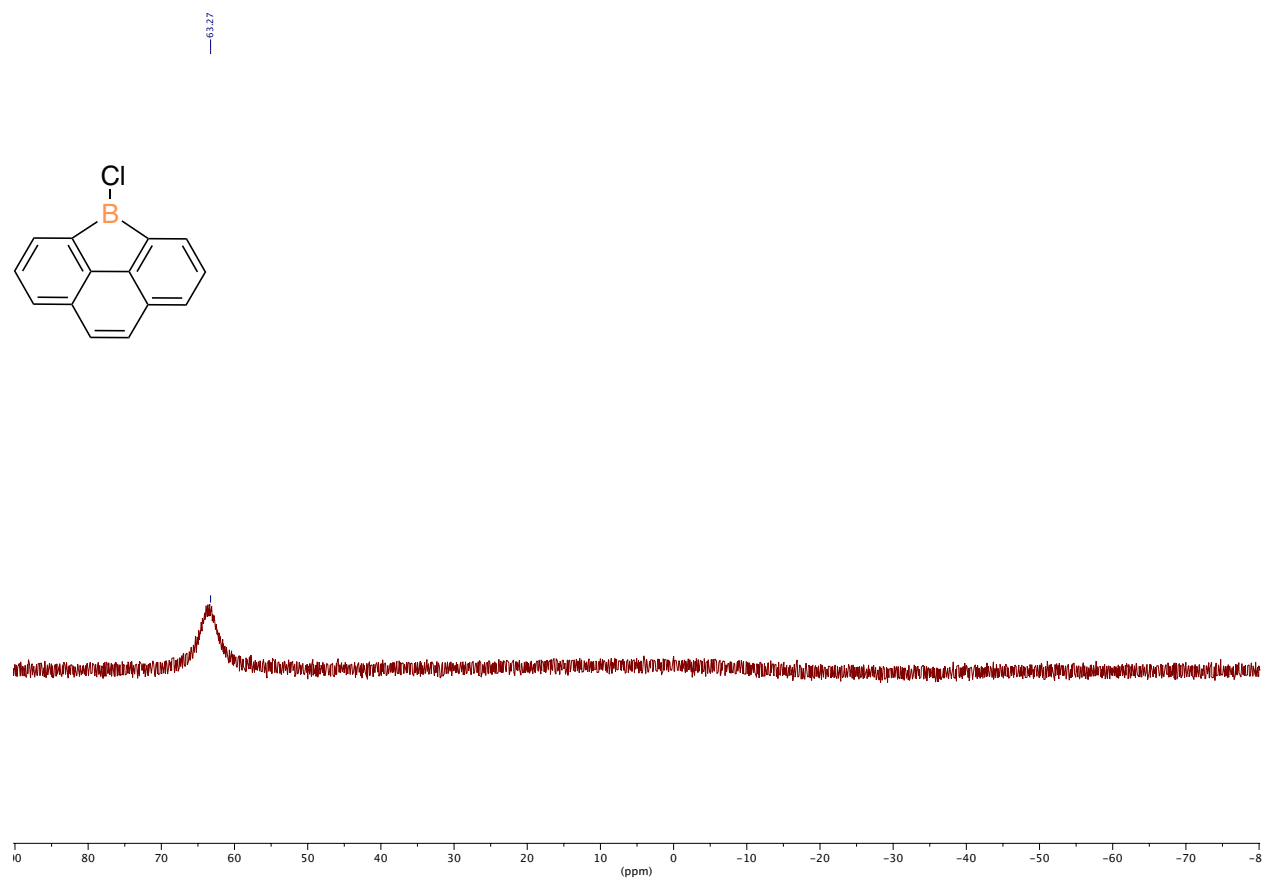

Figure S8:  $^1\text{H}$  NMR spectrum of **2Ph** in  $\text{CDCl}_3$  (400 MHz)

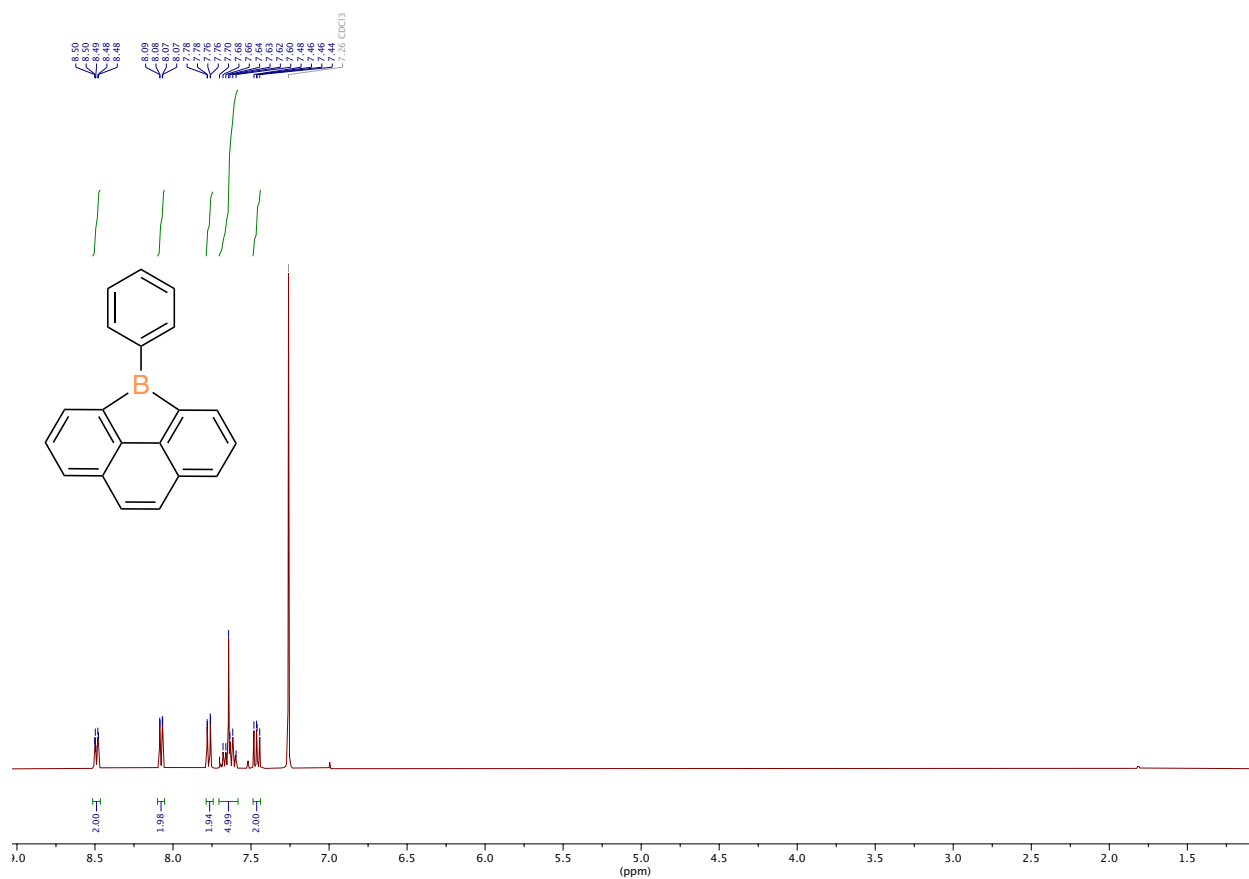

Figure S9:  $^1\text{H}$  NMR spectrum of **2Ph** in  $\text{CDCl}_3$  (400 MHz, expanded view of the aryl region)

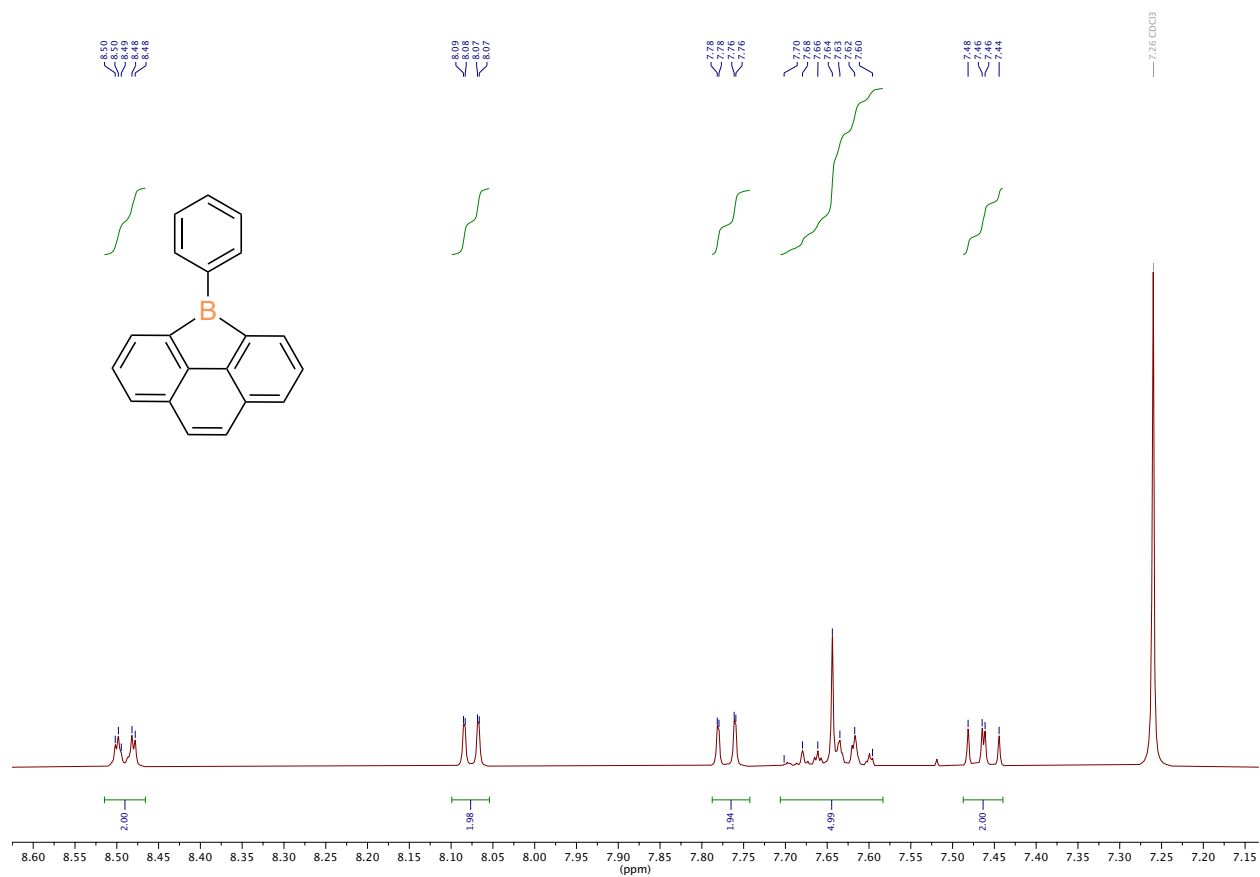

Figure S10:  $^{13}\text{C}\{^1\text{H}\}$  NMR spectrum of **2Ph** in  $\text{CDCl}_3$  (101 MHz)

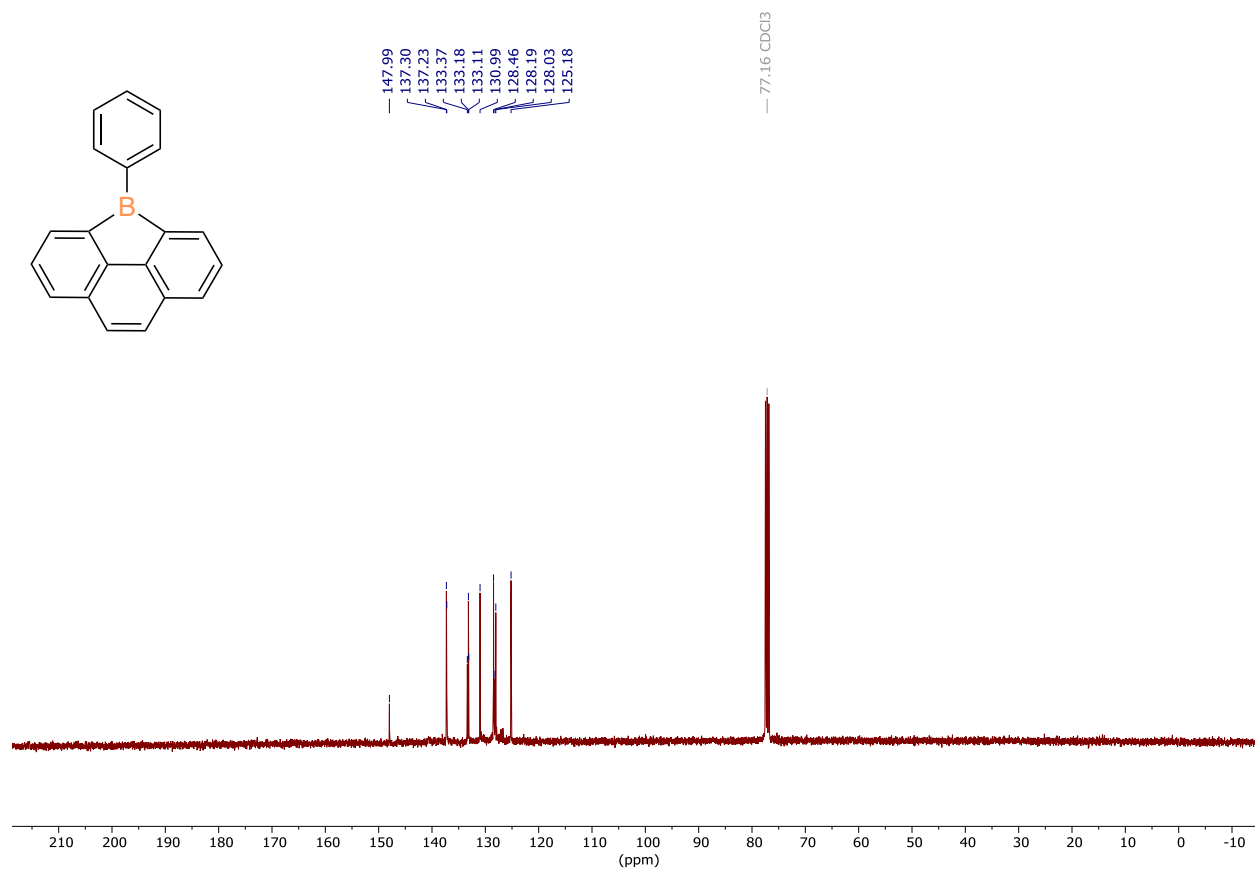



Figure S11:  $^{11}\text{B}$  NMR spectrum of **2Ph** in  $\text{CDCl}_3$  (128 MHz)

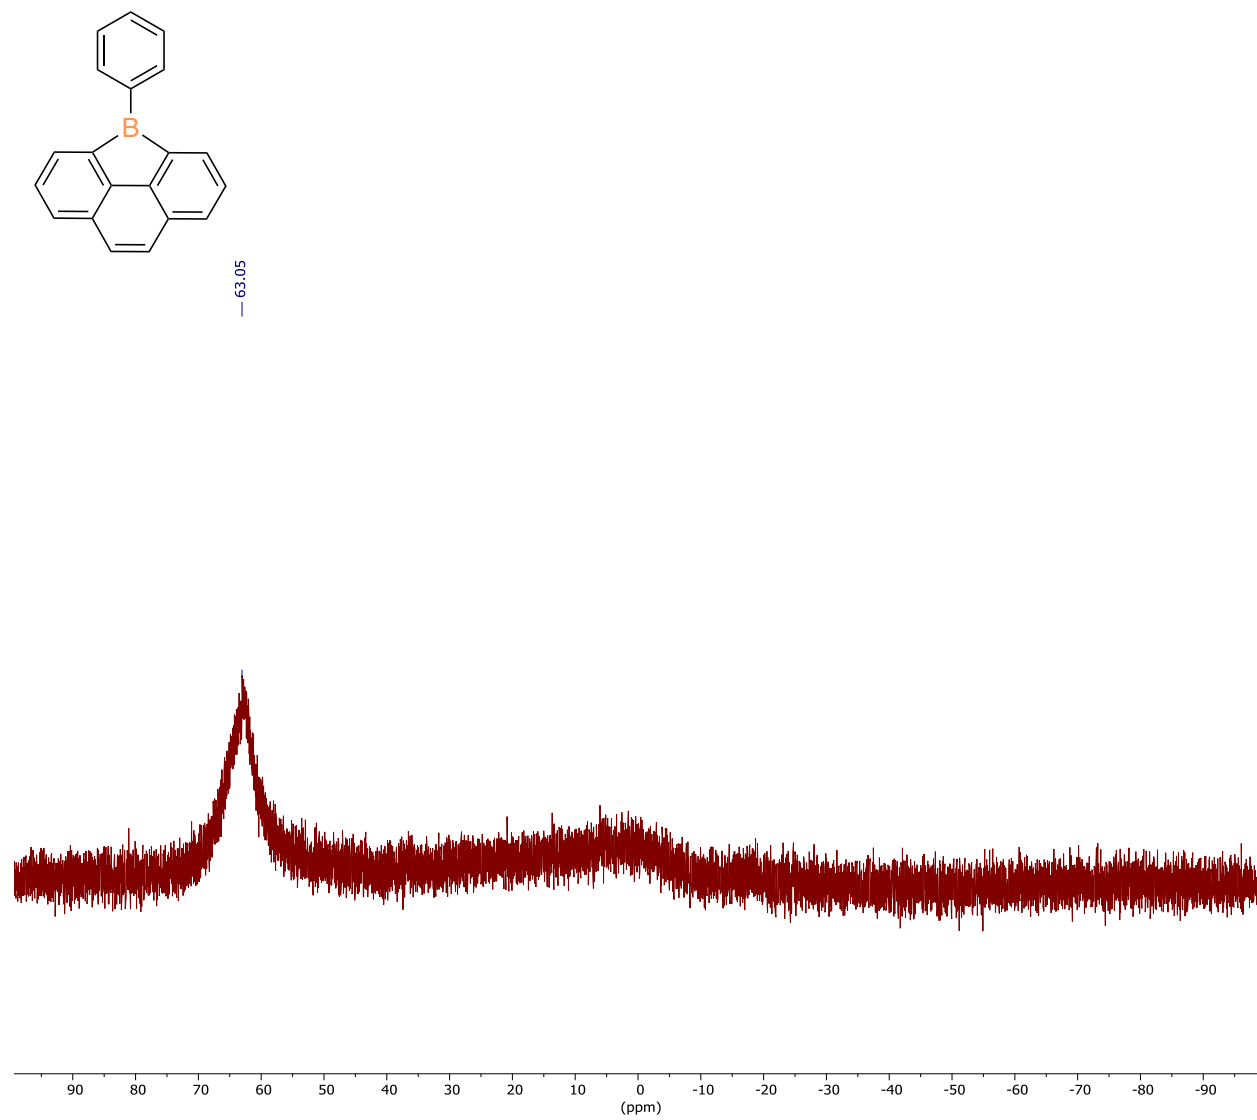

### Determination of the Lewis acidity using Gutmann–Beckett method:

In a small vial, a solution of Et<sub>3</sub>PO (0.02 mmol in 1.0 mL of C<sub>6</sub>D<sub>6</sub>) was added to a solution of the corresponding phenanthrylboroles (0.02 mmol **2Cl** or **2Ph** in 1.0 mL of C<sub>6</sub>D<sub>6</sub>). The reaction mixture was stirred and the <sup>31</sup>P{<sup>1</sup>H} spectrum recorded. The <sup>31</sup>P{<sup>1</sup>H} chemical shifts of Et<sub>3</sub>PO·**2Cl** and Et<sub>3</sub>PO·**2Ph** are shown in Figures S12 and S13, respectively.

Figure S12: <sup>31</sup>P{<sup>1</sup>H} NMR spectrum of **2Cl** in C<sub>6</sub>D<sub>6</sub> (162 MHz)

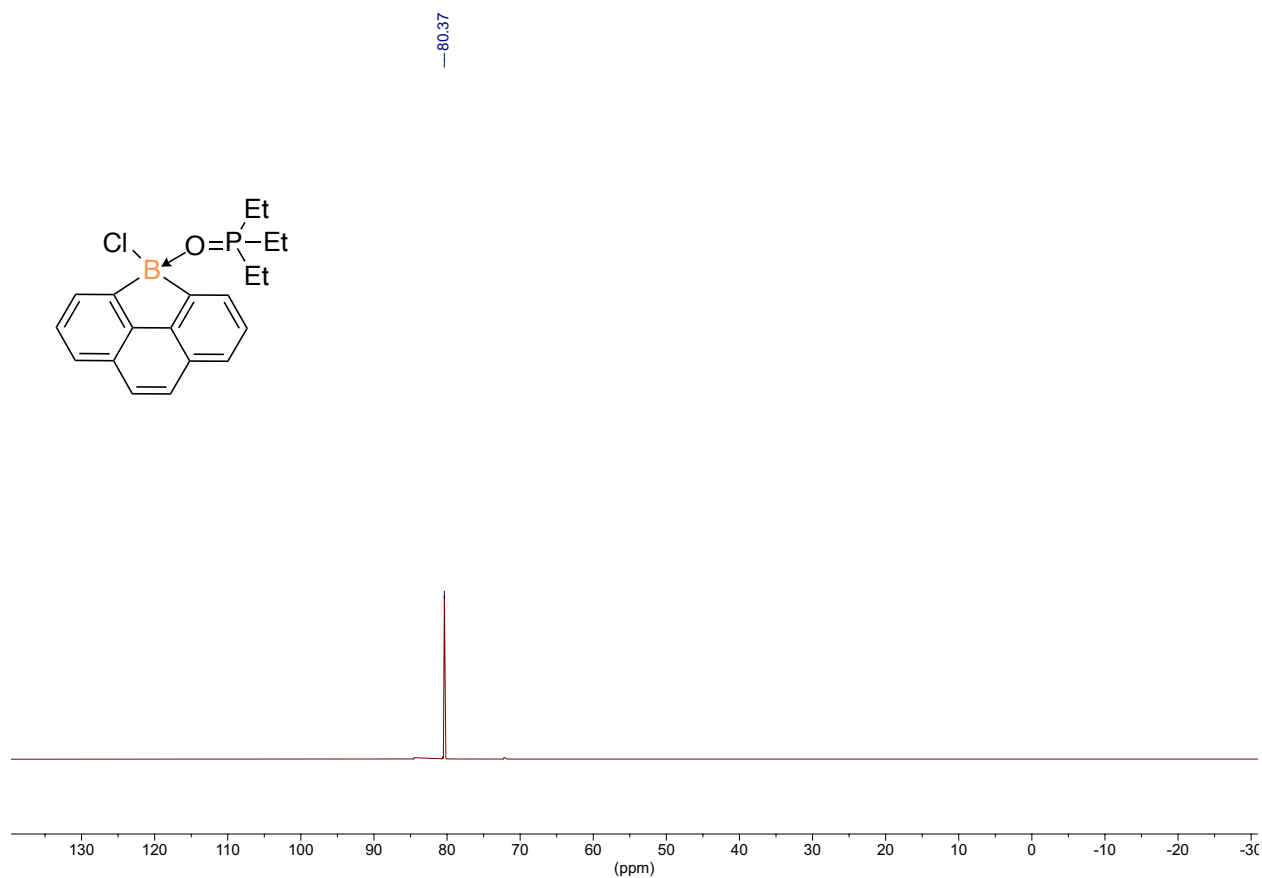

Figure S13:  $^{31}\text{P}\{^1\text{H}\}$  NMR spectrum of **2Ph** in  $\text{C}_6\text{D}_6$  (162 MHz)

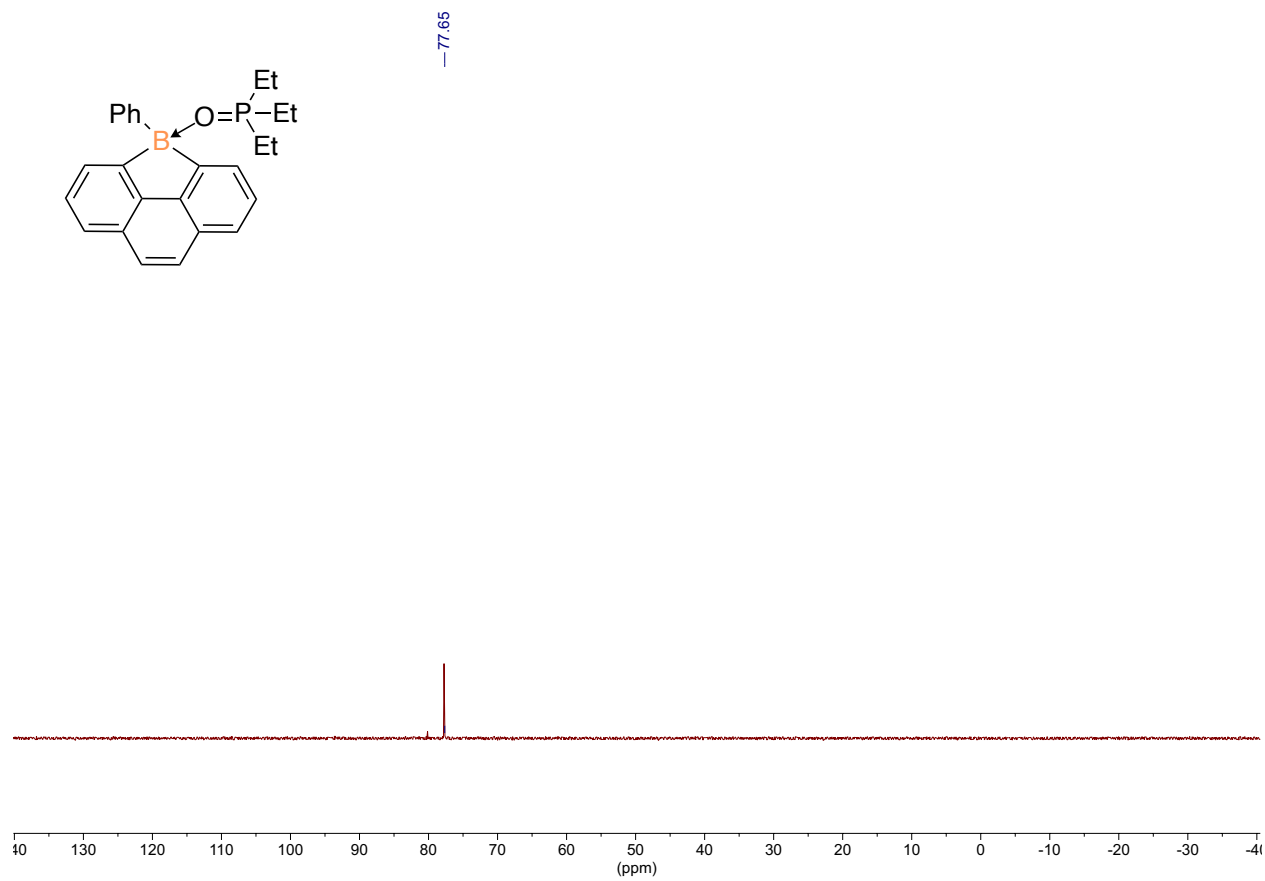

Figure S14:  $^1\text{H}$  NMR spectrum of **3Cl** in  $\text{C}_6\text{D}_6$  (400 MHz)

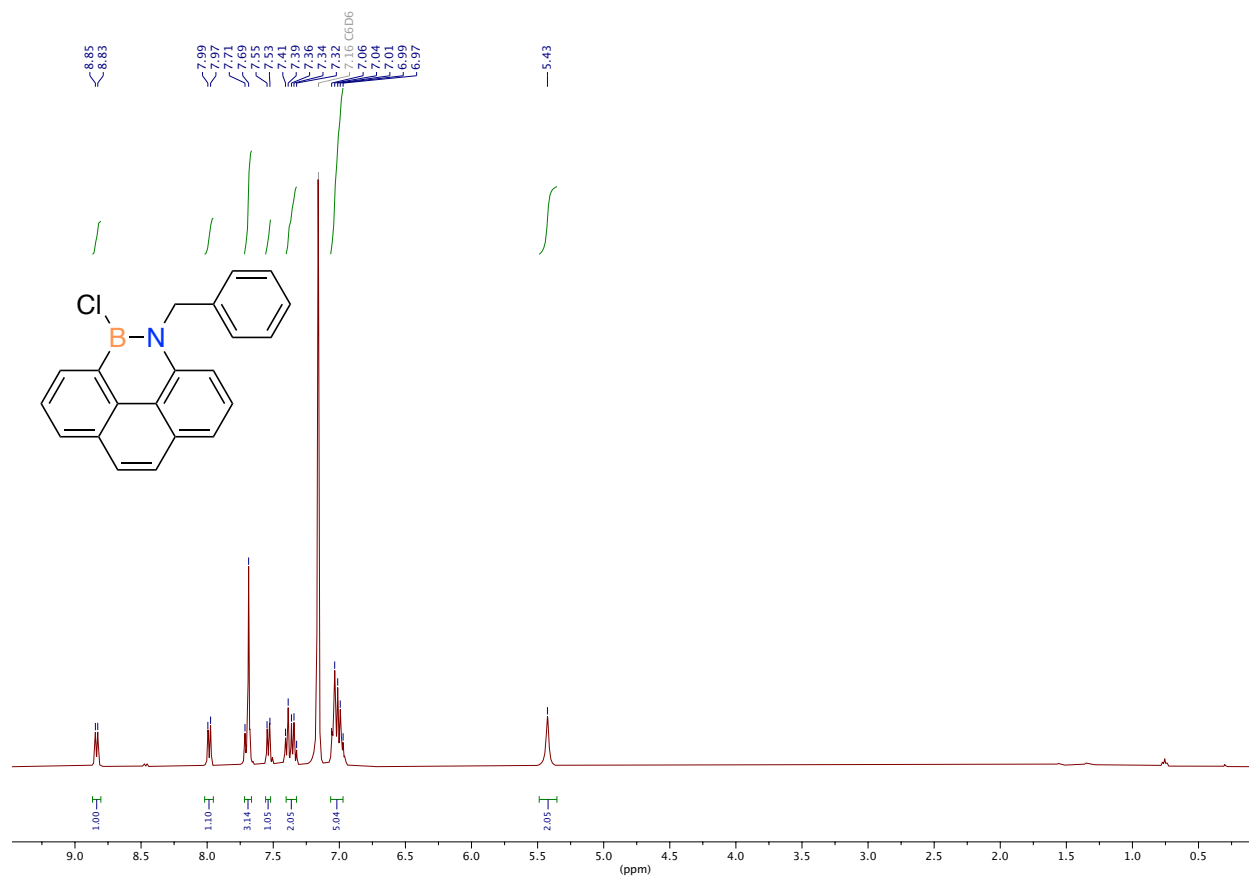

Figure S15:  $^1\text{H}$  NMR spectrum of **3Cl** in  $\text{C}_6\text{D}_6$  (400 MHz, expanded view of the aryl region)

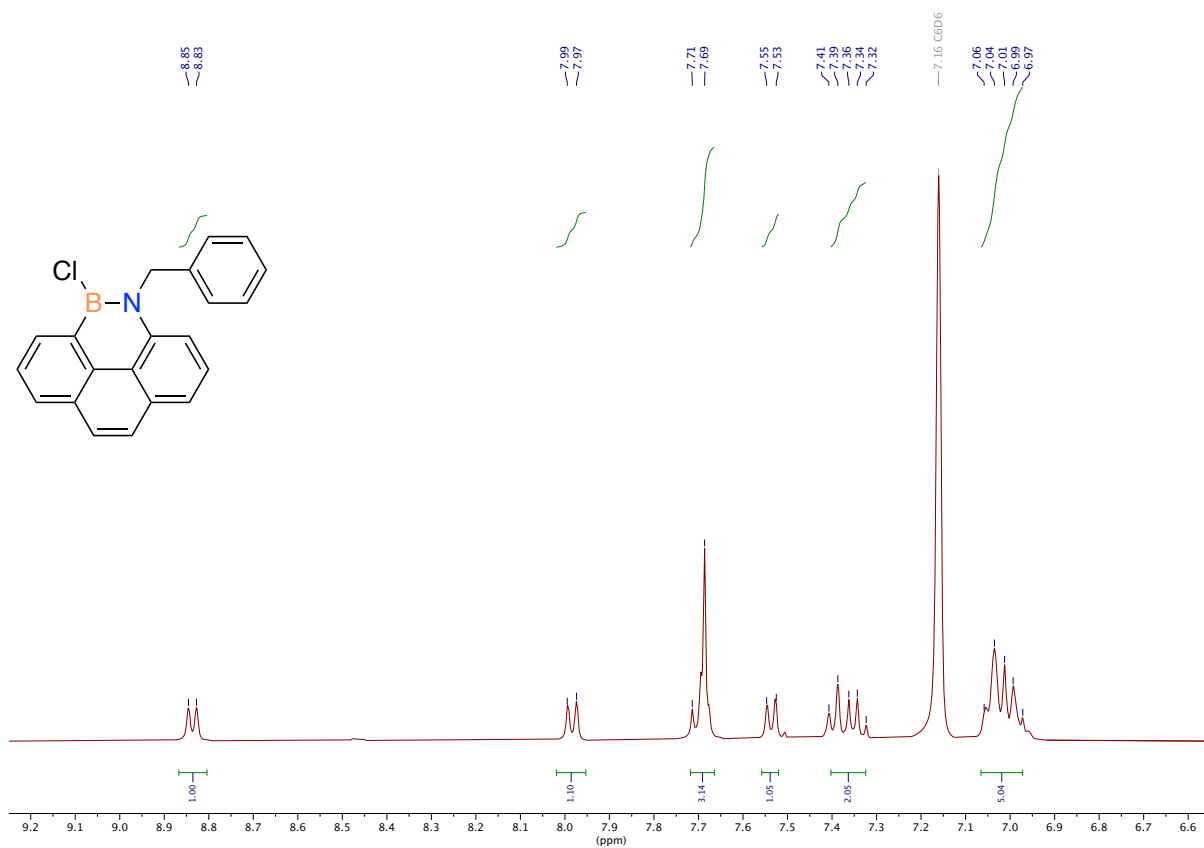

Figure S16:  $^{13}\text{C}\{^1\text{H}\}$  NMR spectrum of **3Cl** in  $\text{C}_6\text{D}_6$  (101 MHz)

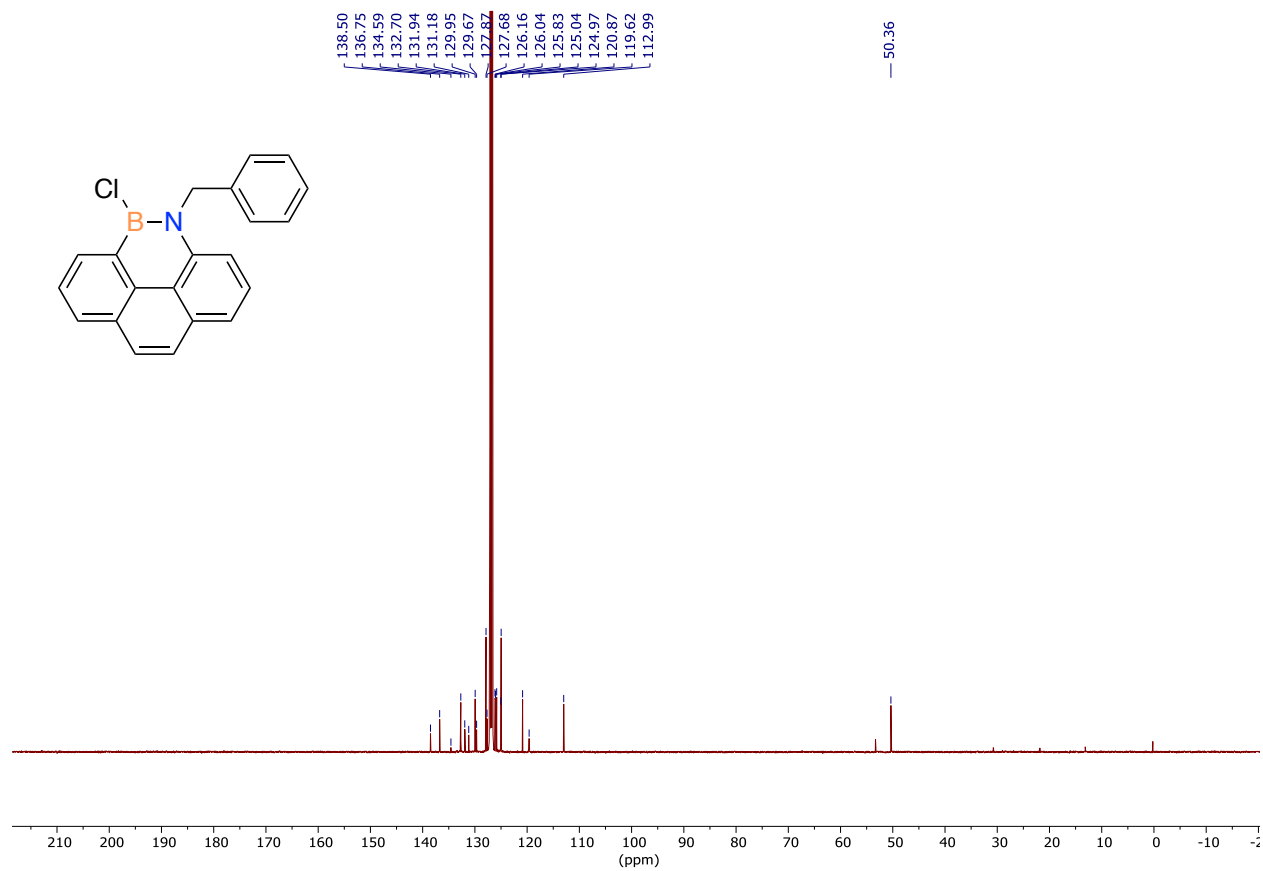

Figure S17:  $^{11}\text{B}$  NMR spectrum of **3Cl** in  $\text{CDCl}_3$  (128 MHz)

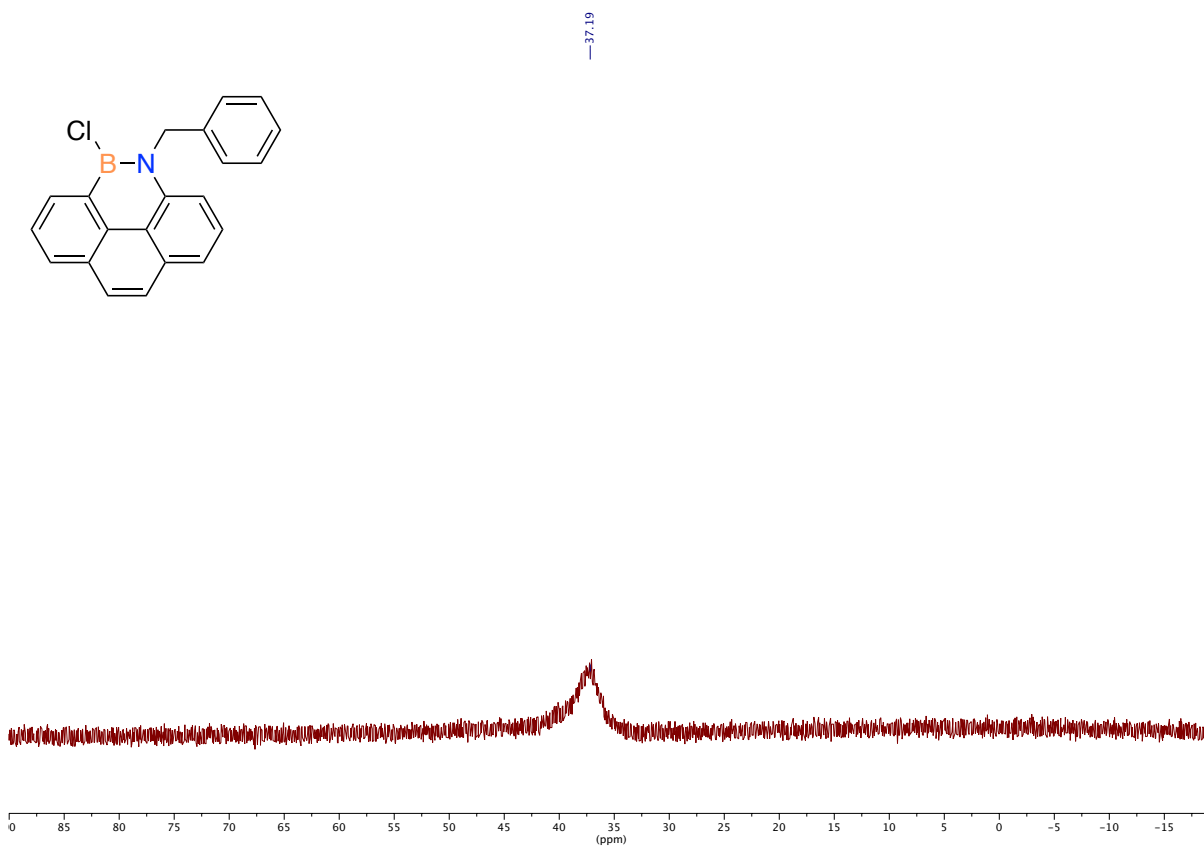

Figure S18:  $^1\text{H}$  NMR spectrum of **3Ph** in  $\text{CDCl}_3$  (400 MHz, \*  $\text{H}_2\text{O}$ , # grease)

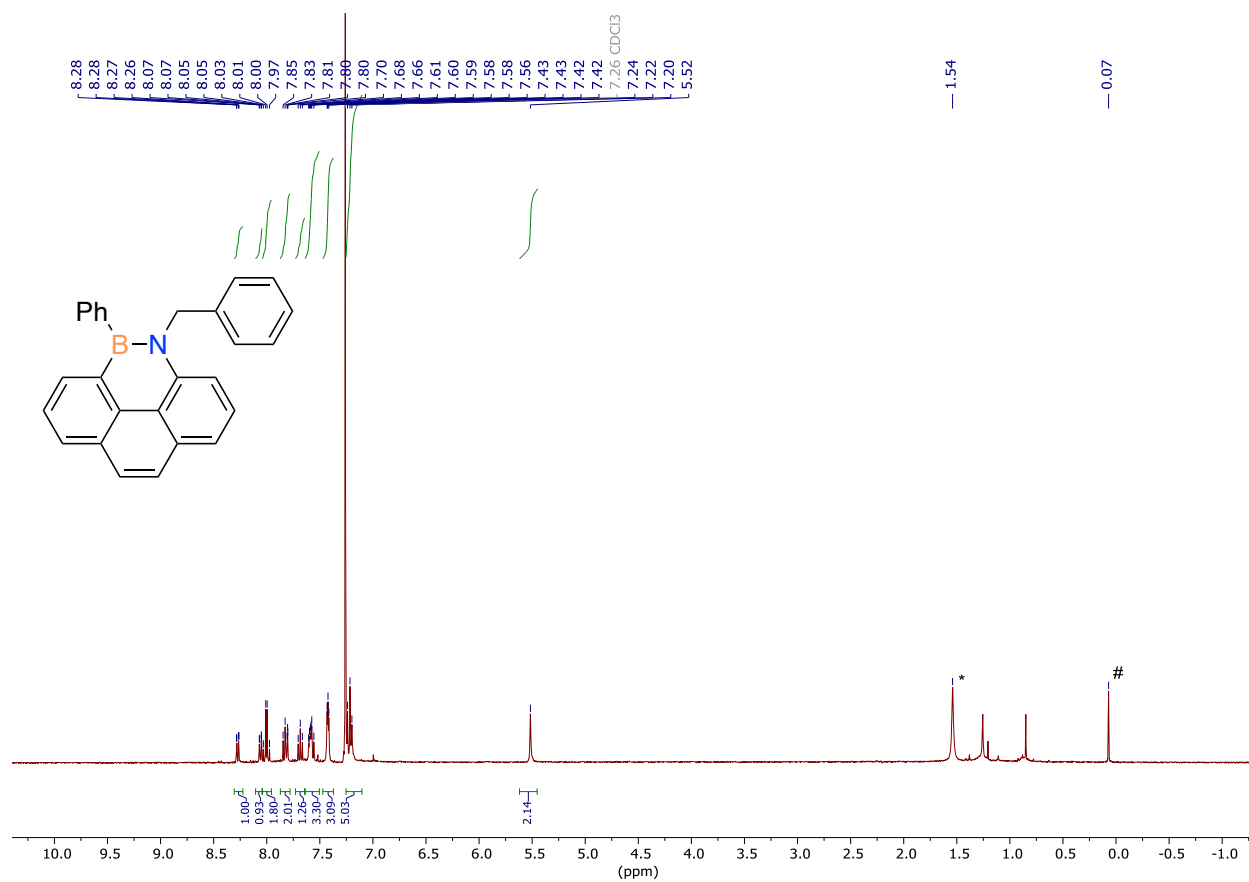



Figure S19:  $^1\text{H}$  NMR spectrum of **3Ph** in  $\text{CDCl}_3$  (400 MHz, expanded view of the aryl region)

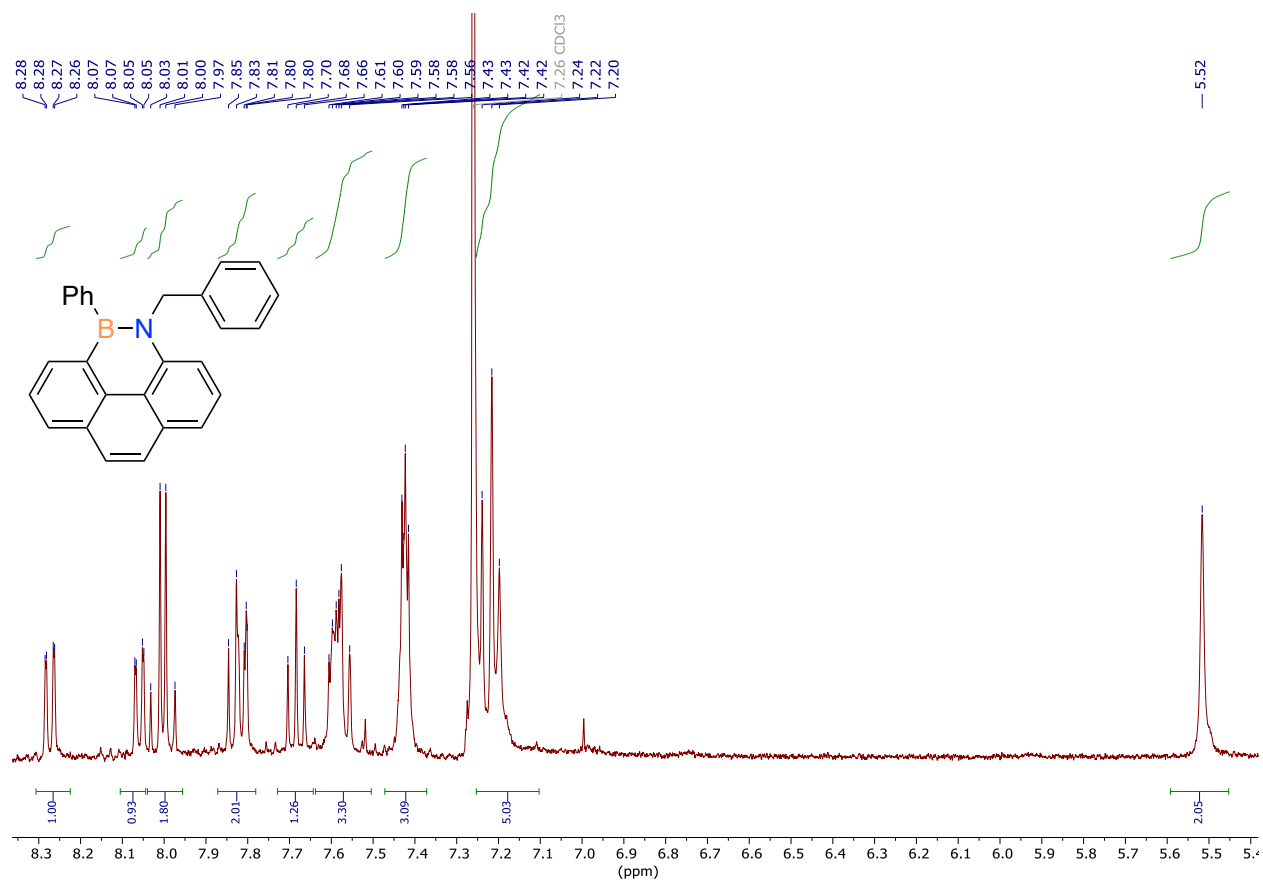

Figure S20:  $^{13}\text{C}\{^1\text{H}\}$  NMR spectrum of **3Ph** in  $\text{C}_6\text{D}_6$  (101 MHz, \* grease)

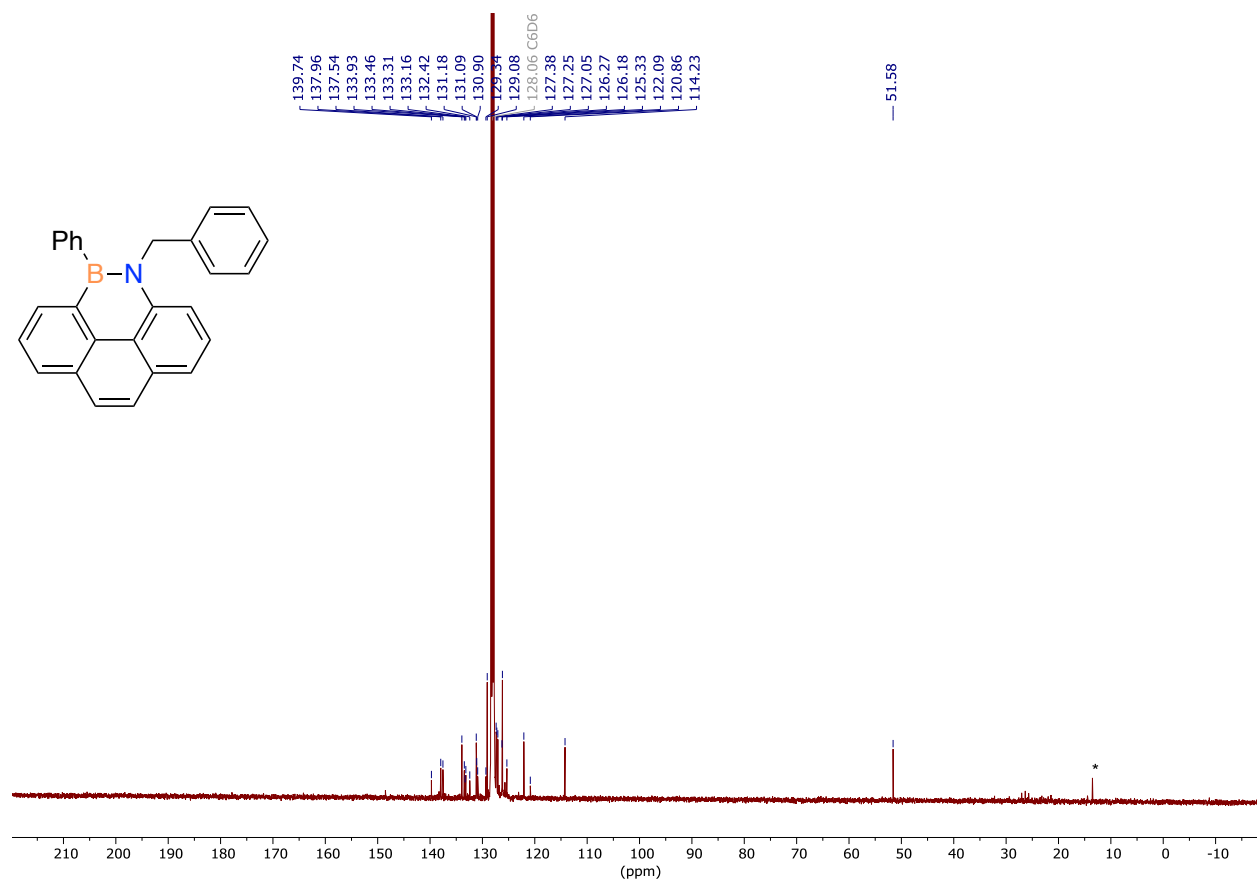

Figure S21:  $^{13}\text{C}\{^1\text{H}\}$  NMR spectrum of **3Ph** in  $\text{CDCl}_3$  (128 MHz, expanded view of the aryl region)

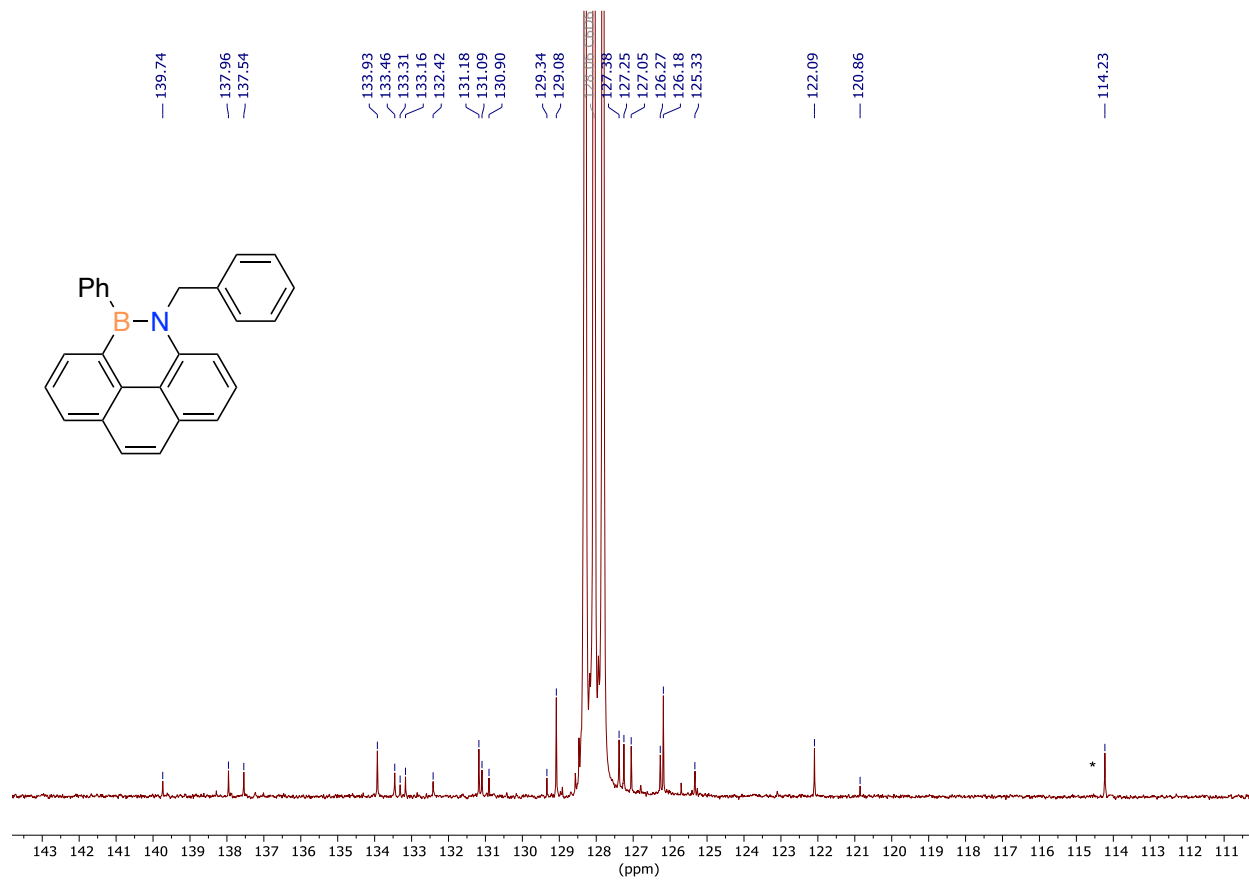

Figure S22:  $^{11}\text{B}$  NMR spectrum of **3Ph** in  $\text{CDCl}_3$  (128 MHz)

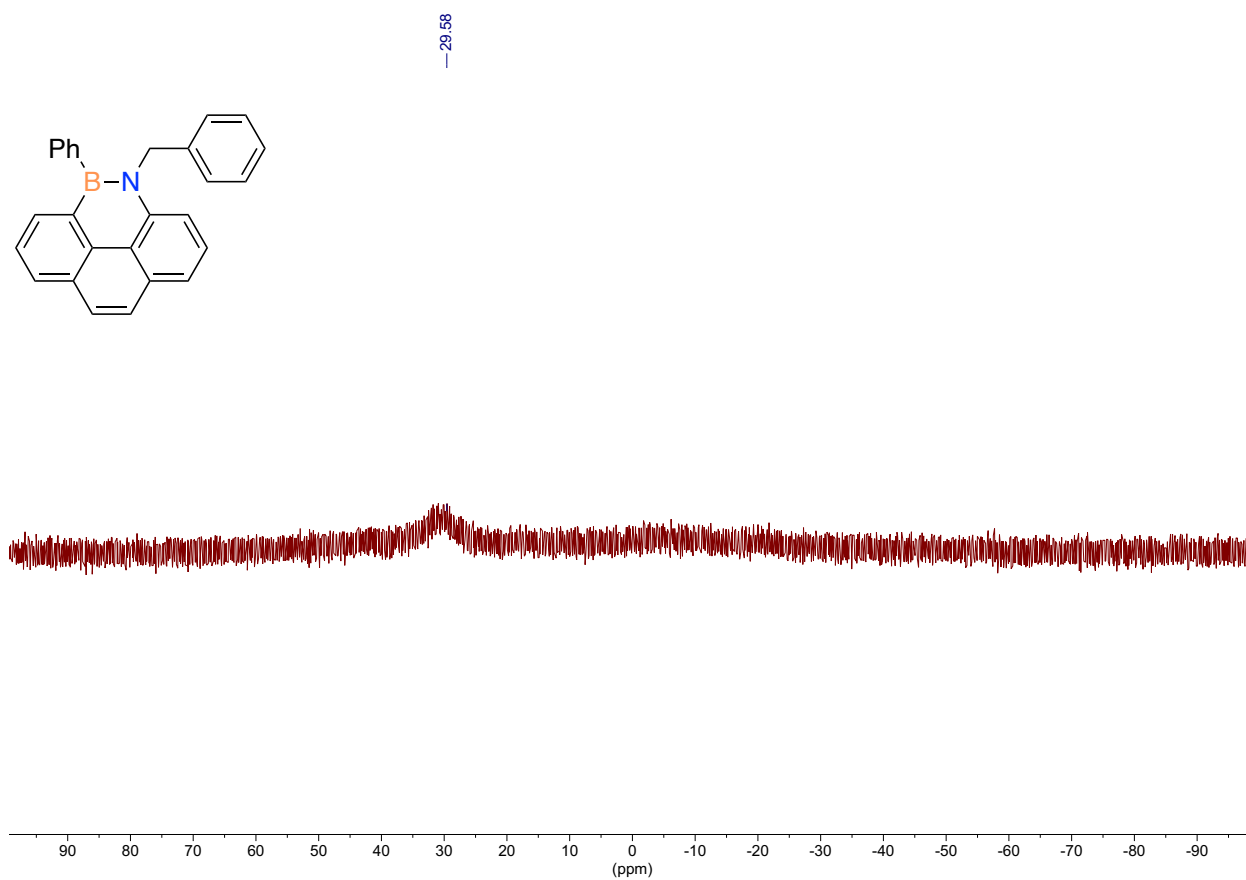

Figure S23: UV-Vis spectra of **2Ph** (a) **3Cl** (c) and **3Ph** (e) in DCM. Graphs showing their linear dependence of the absorbance on the concentration in (b, d, f, respectively)

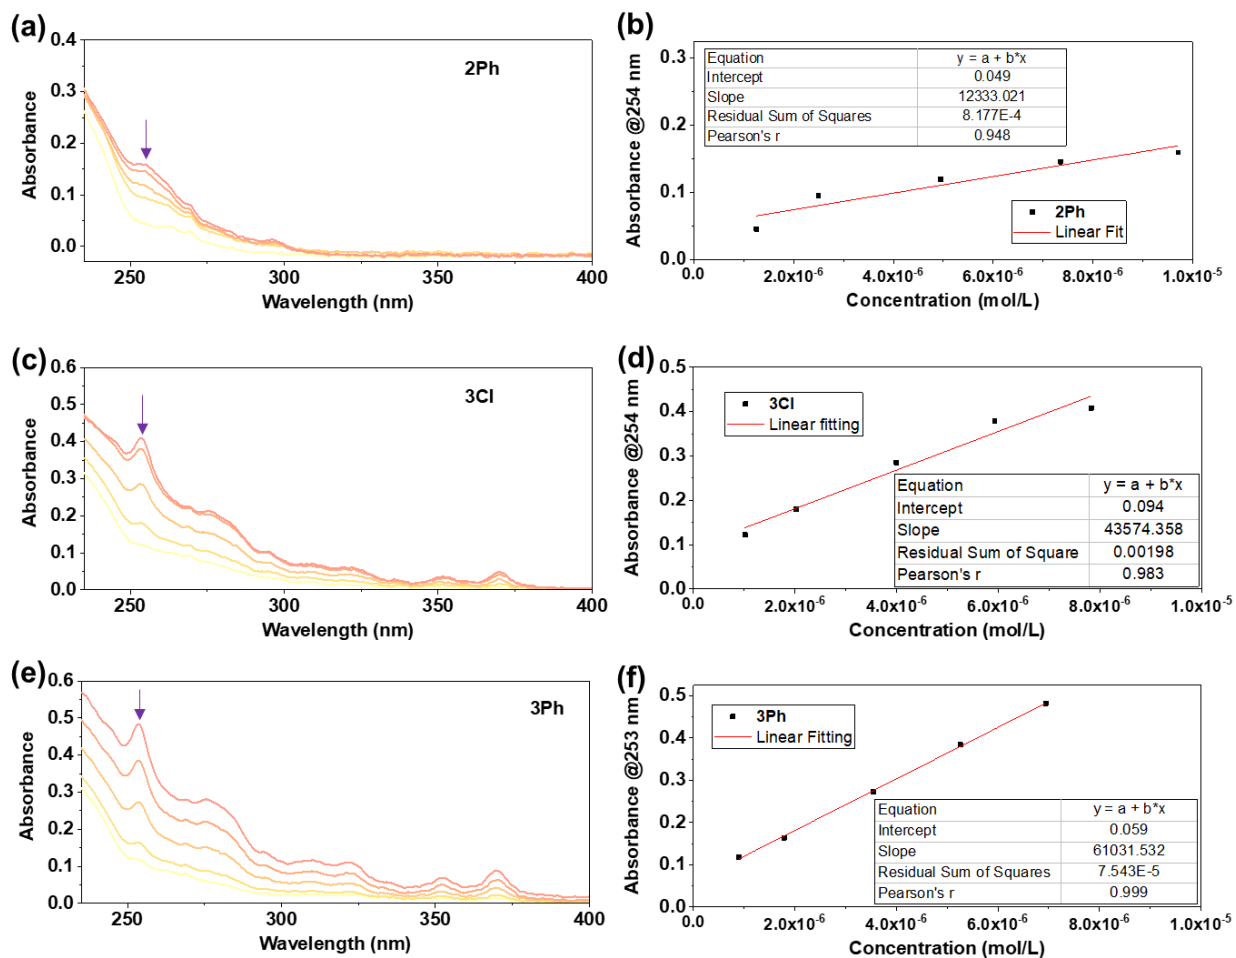

Figure S24: (a) Emission and excitation spectra of **2Ph**, **3Cl**, and **3Ph** in DCM. (b) Lifetime measurements of **2Ph**, **3Cl**, and **3Ph** in DCM using a 273.8 nm laser and monitoring PL peaks at 365 nm for **2Ph** and 375 nm for **3Cl** and **3Ph**.

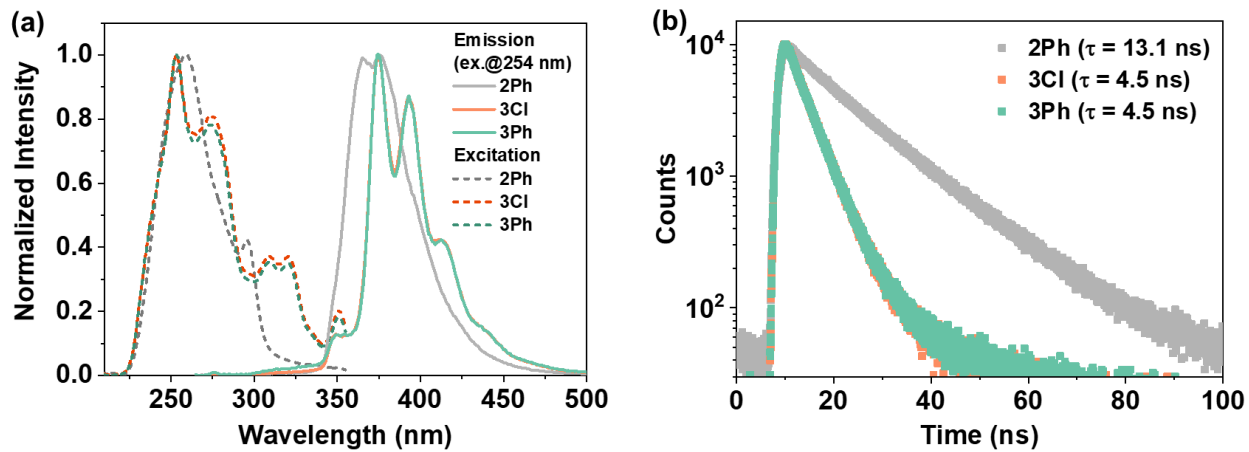

Table S1: X-ray crystallographic details for **2Cl** and **3Cl**.

| Compound                                 | <b>2Cl</b>                         | <b>3Cl</b>                                    |
|------------------------------------------|------------------------------------|-----------------------------------------------|
| CCDC                                     | 2357740                            | 2357741                                       |
| Empirical Formula                        | C <sub>14</sub> H <sub>8</sub> BCl | C <sub>21</sub> H <sub>15</sub> BCIN          |
| FW (g/mol)                               | 222.4780                           | 327.6180                                      |
| Crystal System                           | Monoclinic                         | Orthorhombic                                  |
| Space Group                              | P2 <sub>1</sub>                    | P2 <sub>1</sub> 2 <sub>1</sub> 2 <sub>1</sub> |
| a (Å)                                    | 8.5508(5)                          | 5.4556(3)                                     |
| b (Å)                                    | 3.8729(3)                          | 16.6414(13)                                   |
| c (Å)                                    | 15.8451(10)                        | 17.5759(13)                                   |
| $\alpha$ (deg)                           | 90°                                | 90°                                           |
| $\beta$ (deg)                            | 102.727(3)°                        | 90°                                           |
| $\gamma$ (deg)                           | 90°                                | 90°                                           |
| V (Å <sup>3</sup> )                      | 511.84(6)                          | 1595.70(19)                                   |
| Z                                        | 2                                  | 4                                             |
| D <sub>c</sub> (g cm <sup>-3</sup> )     | 1.444                              | 1.364                                         |
| Radiation (Mo-K $\alpha$ ) $\lambda$ (Å) | 0.71073                            | 0.71073                                       |
| Temp (K)                                 | 150                                | 150                                           |
| R1 [ $I > 2(\sigma)I$ ] <sup>a</sup>     | 9.48%                              | 3.52%                                         |
| wR2 (F <sup>2</sup> ) <sup>a</sup>       | 22.73%                             | 8.69%                                         |
| GOF (S) <sup>a</sup>                     | 1.228                              | 1.122                                         |

<sup>a</sup>  $R_1(F[I > 2(I)]) = \sum ||F_o| - |F_c|| / \sum |F_o|$ ;  $^b wR_2(F^2 [\text{all data}]) = \{[w(F_o^2 - F_c^2)^2] / [w(F_o^2)^2]\}^{1/2}$ ;  $S(\text{all data}) = [w(F_o^2 - F_c^2)^2 / (n - p)]^{1/2}$  ( $n$  = no. of data;  $p$  = no. of parameters varied;  $w = 1/\sigma^2(F_o^2) + (aP)^2 + bP$ ) where  $P = (F_o^2 + 2F_c^2)/3$  and  $a$  and  $b$  are constants suggested by the refinement program.

Figure S25: Solid-state structure of **2Cl**. Thermal ellipsoids are drawn at the 50% probability level. All hydrogen atoms and solvent molecules are omitted for clarity.

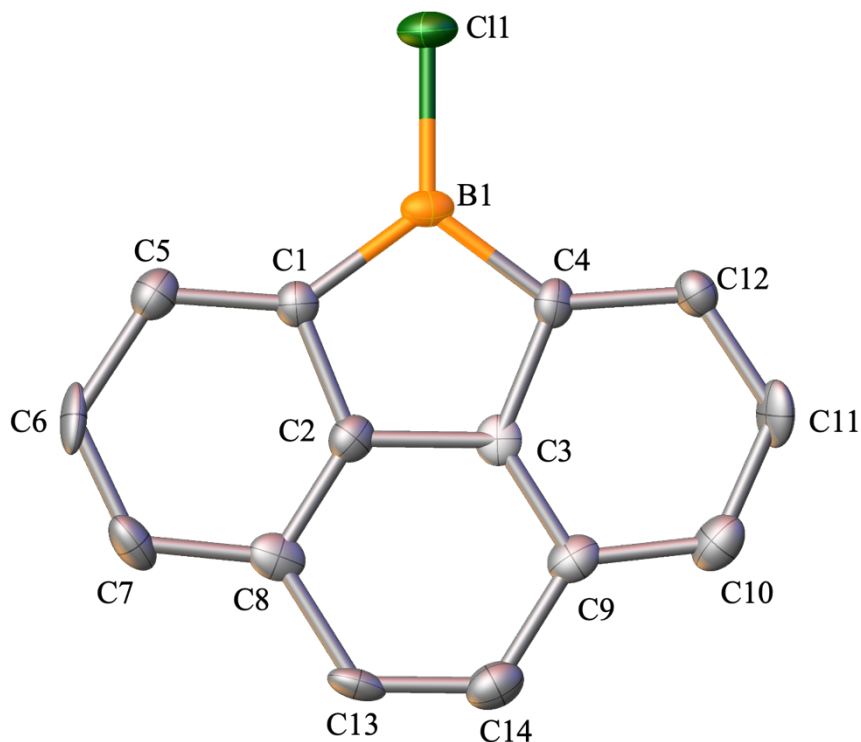

Table S2. Significant bond lengths and angles for **2Cl** and 9-Cl-9-borafluorene.<sup>4</sup>

| Bond     | <b>2Cl</b>  | 9-Cl-9-borafluorene <sup>4</sup> |
|----------|-------------|----------------------------------|
| B1–C1    | 1.580(1) Å  | 1.536(4) Å                       |
| C1–C2    | 1.417(9) Å  | 1.416(3) Å                       |
| C2–C3    | 1.431(8) Å  | 1.481(3) Å                       |
| C3–C4    | 1.444(10) Å | 1.409(3) Å                       |
| B1–C4    | 1.541(10) Å | 1.547(4) Å                       |
| B1–Cl1   | 1.746(8) Å  | 1.752(3) Å                       |
| C4–B1–C1 | 106.6(6)°   | 105.9(2)°                        |
| B1–C1–C2 | 104.4(5)°   | 106.8(2)°                        |
| C1–C2–C3 | 112.5(6)°   | 110.2(2)°                        |
| C2–C3–C4 | 111.5(6)°   | 110.4(2)°                        |
| C3–C4–B1 | 104.9(5)°   | 106.6(2)°                        |



Figure S26: Solid-state structure of **3Cl**. Thermal ellipsoids are drawn at the 50% probability level. All hydrogen atoms and solvent molecules are omitted for clarity.

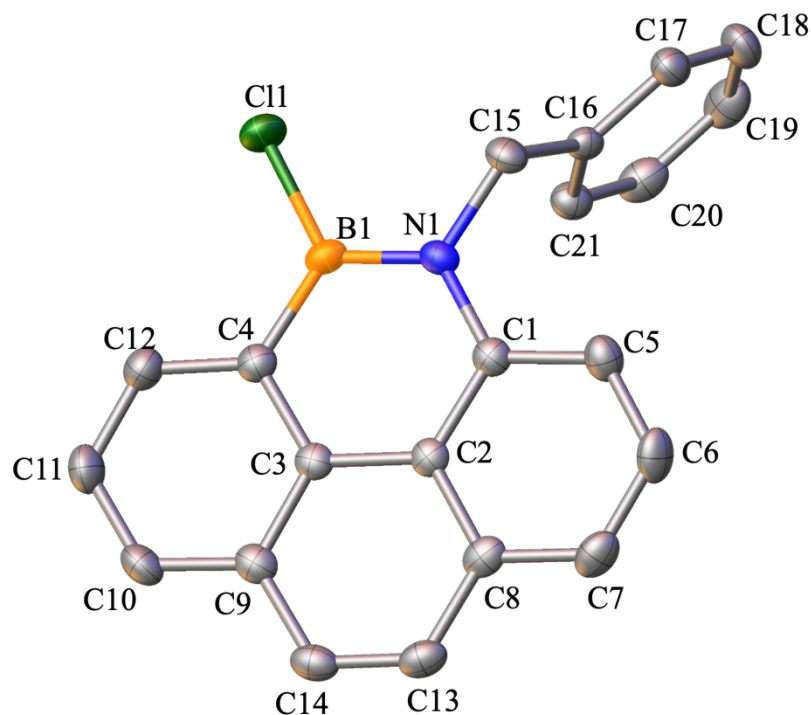

Table S3. Significant bond lengths and dihedral angles for **3Cl** and literature-known 9,10-B,N-phenanthrene.<sup>5</sup>

| Bond       | <b>3Cl</b> | 8Cl <sup>5</sup> | 10Cl <sup>5</sup> |
|------------|------------|------------------|-------------------|
| B(1)–N(1)  | 1.406(3) Å | 1.403(3) Å       | 1.416(2) Å        |
| N(1)–C(1)  | 1.418(3) Å | 1.420(2) Å       | 1.429(2) Å        |
| C(1)–C(2)  | 1.424(3) Å | 1.411(3) Å       | 1.431(2) Å        |
| C(2)–C(3)  | 1.434(3) Å | 1.473(3) Å       | 1.469(3) Å        |
| C(3)–C(4)  | 1.422(3) Å | 1.411(3) Å       | 1.408(3) Å        |
| C(4)–B(1)  | 1.540(4) Å | 1.523(3) Å       | 1.534(3) Å        |
| B(1)–Cl(1) | 1.789(3) Å | 1.781(2) Å       | 1.797(2) Å        |

## REFERENCES

1. O. V. Dolomanov, L. J. Bourhis, R. J. Gildea, J. A. Howard and H. Puschmann, *J. Appl. Crystallogr.*, 2009, **42**, 339-341.
2. G. M. Sheldrick, *Acta Crystallogr.*, 2008, **64**, 112-122.
3. H. Bock, M. Sievert and Z. Havlas, *Chem. Eur. J.*, 1998, **4**, 677-685.
4. S. Biswas, I. M. Oppel and H. F. Bettinger, *Inorg. Chem.*, 2010, **49**, 4499-4506.
5. S. Yruegas, J. J. Martinez and C. D. Martin, *Chem. Comm.*, 2018, **54**, 6808-6811.
